# Supplementary material for: Fauna of nocturnal moth species collected in a semi-natural grassland at Kanpu-zan in northern Japan
Source: Biodivers Data J. 2019 Aug 2;7:e37968. doi: 10.3897/BDJ.7.e37968 (PMC6688993; doi:10.3897/BDJ.7.e37968)
Supplement: Supplementary material 1 — monthly species occurences [file bdj-07-e37968-s001.csv]

family	genus	species name	food	specialist/generalist	May_forest	May_grassland	May_mixed	May_1987	June_forest	June_grassland	June_mixed	June_1987	July_forest	July_grassland	July_mixed	July_1987	August_forest	August_grassland	August_mixed	August_1987	September_forest	September_grassland	September_mixed	September_1987	September_forest	September_grassland	September_mixed
Bombycidae	Bombyx	Bombyx mandarina (Moore, 1872)	woody	specialist	0	0	0	0	0	0	0	0	0	0	0	0	1	3	0	0	0	0	0	0	0	0	0
Chrysopeleiidae	Ascalenia	Ascalenia sp. (Japanese name: Sugurokazariba)	unknown	unknown	0	0	0	0	0	0	0	0	0	0	1	0	0	0	0	0	0	0	0	0	0	0	0
Cosmopterigidae	Pyroderces	Pyroderces sarcogypsa (Meyrick, 1932)	unknown	unknown	0	0	0	0	0	0	0	0	0	0	0	0	0	0	0	0	0	0	2	0	0	0	0
Cosmopterigidae	Ressia	Ressia quercidentella Sinev, 1988	unknown	unknown	0	0	0	0	0	0	0	0	0	0	0	0	1	0	1	0	0	0	0	0	0	0	0
Cossidae	Phragmataecia	Pharagmataecia castaneae_(H_bner, 1790)	herb	specialist	0	0	0	0	0	0	0	0	0	0	0	4	0	0	0	0	0	0	0	0	0	0	0
Cossidae	Zeuzera	Zeuzera multistrigata Moore, 1881	woody	generalist	0	0	0	0	0	0	0	0	1	0	1	0	0	1	0	0	0	0	0	0	0	0	0
Crambidae	Agrotera	Agrotera posticalis Wileman, 1911	woody	specialist	0	0	0	0	0	0	0	0	0	0	0	0	0	0	1	0	0	0	0	0	0	0	0
Crambidae	Anania	Anania albeoverbascalis Yamanaka, 1966	unknown	unknown	0	0	0	0	0	0	0	0	0	0	0	2	0	0	0	0	0	0	0	0	0	0	0
Crambidae	Anania	Anania verbascalis_([Denis & Schifferm_ller], 1775)	herb	specialist	0	0	0	0	0	0	0	0	0	0	0	0	0	0	0	2	0	0	0	0	0	0	0
Crambidae	Ancylolomia	Ancylolomia japonica Zeller, 1877	herb	specialist	0	0	0	0	0	0	0	0	0	0	0	0	0	0	2	0	0	0	0	0	0	0	0
Crambidae	Bradina	Bradina angustalis Yamanaka, 1984	unknown	unknown	0	0	0	0	0	0	0	0	0	0	0	2	0	0	0	0	0	0	0	0	0	0	0
Crambidae	Bradina	Bradina atopalis (Walker, 1859)	unknown	unknown	0	0	0	0	0	0	0	0	0	0	0	0	2	3	1	0	0	0	0	0	0	0	0
Crambidae	Calamotropha	Calamotropha okanoi_Bleszynski, 1961	unknown	unknown	0	0	0	0	0	0	0	0	0	0	0	0	0	0	0	1	0	0	0	0	0	0	0
Crambidae	Camptomastix	Camptomastix hisbonalis (Walker, 1859)	unknown	unknown	0	0	0	0	1	0	0	0	0	0	0	0	0	0	0	0	0	0	0	0	0	0	0
Crambidae	Chilo	Chilo luteellus (Motschulsky, 1866)	herb	generalist	0	0	0	0	0	0	0	0	0	0	0	0	0	0	1	0	0	0	0	0	0	0	0
Crambidae	Chilo	Chilo suppressalis_(Walker, 1863)	herb	specialist	0	0	0	0	0	0	0	1	0	0	0	6	0	0	0	1	0	0	0	0	0	0	0
Crambidae	Chrysoteuchia	Chrysoteuchia diplogramma (Zeller, 1863)	herb	specialist	0	0	0	0	0	0	0	0	0	0	0	0	1	0	0	0	0	0	0	0	0	0	0
Crambidae	Circobotys	Circobotys nycterina Butler, 1879	unknown	unknown	0	0	0	0	0	0	0	1	0	0	0	0	0	0	0	0	0	0	0	0	0	0	0
Crambidae	Cnaphalocrocis	Cnaphalocrocis medinalis_(Guen_e, 1854)	herb	specialist	0	0	0	0	0	0	0	0	0	0	0	0	0	0	0	14	0	0	0	0	0	0	0
Crambidae	Cnaphalocrocis	Cnaphalocrocis stereogona (Meyrick, 1886)	herb	specialist	0	0	0	0	0	0	0	0	1	0	0	1	0	0	0	0	0	0	0	0	0	0	0
Crambidae	Crambus	Crambus argyrophorus_Butler, 1878	unknown	unknown	0	0	0	0	0	0	0	0	0	0	0	1	0	0	0	2	0	0	0	0	0	0	0
Crambidae	Crambus	Crambus perlellus_(Scopoli, 1763)	herb	specialist	0	0	0	0	0	0	0	0	0	0	0	0	0	0	0	1	0	0	0	0	0	0	0
Crambidae	Daulia	Daulia afralis_Walker, 1859	herb	specialist	0	0	0	0	0	0	0	0	0	0	0	0	0	0	0	4	0	0	0	0	0	0	0
Crambidae	Diasemia	Diasemia reticularis_(Linnaeus, 1761)	herb	generalist	0	0	0	0	0	0	0	0	0	0	0	0	0	0	0	1	0	0	0	0	0	0	0
Crambidae	Dolicharthria	Dolicharthria bruguieralis_(Duponchel, 1833)	herb	generalist	0	0	0	0	0	0	0	0	0	0	0	5	0	0	0	0	0	0	0	0	0	0	0
Crambidae	Flavocrambus	Flavocrambus striatellus_(Leech, 1889)	unknown	unknown	0	0	0	0	0	0	0	0	0	0	0	3	0	0	0	3	0	0	0	0	0	0	0
Crambidae	Glaucocharis	Glaucocharis exsectella (Christoph, 1881)	lichen/moss	specialist	0	0	0	0	0	0	0	0	0	0	1	1	0	0	0	0	0	0	0	0	0	0	0
Crambidae	Glyphodes	Glyphodes pryeri_Butler, 1879	woody	specialist	0	0	0	0	0	0	0	1	0	0	0	0	0	0	0	0	0	0	0	0	0	0	0
Crambidae	Haritalodes	Haritalodes derogatus (Fabricius, 1775)	woody	specialist	0	0	0	0	0	0	0	0	0	0	1	0	0	0	0	0	0	0	0	0	0	0	0
Crambidae	Herpetogramma	Herpetogramma luctuosale (Guen_e, 1854)	woody	specialist	0	0	0	0	0	0	0	0	0	0	3	2	3	0	4	3	0	1	0	0	0	0	0
Crambidae	Herpetogramma	Herpetogramma magnum (Butler, 1879)	herb/woody	generalist	0	0	0	0	0	0	0	0	0	0	1	0	0	0	0	0	0	0	0	0	0	0	0
Crambidae	Herpetogramma	Herpetogramma moderatale_(Christoph, 1881)	herb	generalist	0	0	0	0	0	0	0	0	0	0	0	0	0	0	0	2	0	0	0	0	0	0	0
Crambidae	Herpetogramma	Herpetogramma stultale_(Walker, 1859)	herb	generalist	0	0	0	0	0	0	0	0	0	0	0	0	0	0	0	1	0	0	0	0	0	0	0
Crambidae	Mabra	Mabra charonialis_(Walker, 1859)	dead leaves	generalist	0	0	0	0	0	0	0	0	0	0	0	6	0	0	0	10	0	0	0	0	0	0	0
Crambidae	Maruca	Maruca vitrata_(Fabricius, 1787)	herb	specialist	0	0	0	0	0	0	0	0	0	0	0	0	0	0	0	0	0	0	0	19	0	0	0
Crambidae	Microchilo	Microchilo inouei_Okano, 1962	unknown	unknown	0	0	0	0	0	0	0	0	0	0	0	4	0	0	0	0	0	0	0	0	0	0	0
Crambidae	Nacoleia	Nacoleia commixta (Butler, 1879)	woody	generalist	0	0	0	0	0	0	0	0	0	0	0	4	1	0	0	1	1	0	0	0	0	0	0
Crambidae	Nacoleia	Nacoleia sibirialis_(Milli_re, 1879)	unknown	unknown	0	0	0	0	0	0	0	0	0	0	0	1	0	0	0	2	0	0	0	0	0	0	0
Crambidae	Nacoleia	Nacoleia tampiusalis (Walker, 1859)	unknown	unknown	0	0	0	0	0	0	0	0	0	0	0	0	0	1	2	0	0	0	0	0	0	0	0
Crambidae	Nomis	Nomis albopedalis Motschulsky, 1861	unknown	unknown	0	0	0	0	0	0	2	2	0	1	0	0	2	1	2	5	0	3	0	0	0	0	0
Crambidae	Nomophila	Nomophila noctuella_(Denis & Schifferm_ller, 1775)	herb/woody	generalist	0	0	0	0	0	0	0	0	0	0	0	0	0	0	0	1	0	0	0	1	0	0	0
Crambidae	Omiodes	Omiodes tristrialis (Bremer, 1864)	unknown	unknown	0	0	0	0	0	0	0	1	0	0	0	0	0	0	1	2	0	0	1	0	0	0	0
Crambidae	Ostrinia	Ostrinia latipennis (Warren, 1892)	herb	specialist	0	0	0	0	0	0	0	6	0	0	0	0	0	0	0	0	0	0	0	0	0	0	0
Crambidae	Palpita_	Palpita nigropunctalis (Bremer, 1864)	woody	generalist	0	0	0	0	1	5	1	0	0	1	1	0	0	0	0	0	0	6	0	0	1	0	0
Crambidae	Patissa	Patissa fulvosparsa (Butler, 1881)	unknown	unknown	0	0	0	0	0	0	0	0	0	0	1	0	0	0	0	0	0	0	0	0	0	0	0
Crambidae	Piletocera	Piletocera sodalis_(Leech, 1889)	unknown	unknown	0	0	0	0	0	0	0	0	0	0	0	2	0	0	0	0	0	0	0	0	0	0	0
Crambidae	Platytes	Platytes ornatella_(Leech, 1889)	unknown	unknown	0	0	0	0	0	0	0	0	0	0	0	0	0	0	0	15	0	0	0	0	0	0	0
Crambidae	Pleuroptya	Pleuroptya chlorophanta_(Butler, 1878)	woody	generalist	0	0	0	0	0	0	0	0	0	0	0	1	0	0	0	0	0	0	0	0	0	0	0
Crambidae	Pleuroptya	Pleuroptya harutai (Inoue, 1955)	woody	specialist	0	0	0	0	0	1	0	0	0	0	0	0	0	0	0	0	0	0	0	0	0	0	0
Crambidae	Pleuroptya	Pleuroptya inferior_(Hampson, 1898)	herb	specialist	0	0	0	0	0	0	0	0	0	0	0	3	0	0	0	1	0	0	0	0	0	0	0
Crambidae	Prodasycnemis	Prodasycnemis inornata (Butler, 1879)	herb	specialist	0	0	0	0	0	0	0	0	0	0	0	1	0	0	0	0	0	0	0	0	0	0	0
Crambidae	Pyrausta	Pyrausta unipunctata_Butler, 1881	unknown	unknown	0	0	0	0	0	0	0	0	0	0	0	4	0	0	0	1	0	0	0	0	0	0	0
Crambidae	Scirpophaga	Scirpophaga virginia_Schultze, 1908	unknown	unknown	0	0	0	0	0	0	0	0	0	0	0	2	0	0	0	0	0	0	0	0	0	0	0
Crambidae	Sitochroa	Sitochroa palealis (Denis & Schifferm_ller, 1775)	herb	specialist	0	0	0	0	0	0	0	0	0	0	0	0	0	1	0	0	0	0	0	0	0	0	0
Crambidae	Sitochroa	Sitochroa umbrosalis (Warren, 1892)	herb	specialist	0	0	0	0	0	0	0	0	1	1	0	1	1	0	1	1	0	1	0	0	0	0	0
Crambidae	Sitochroa	Sitochroa verticalis (Linnaeus, 1758)	herb	generalist	0	0	0	0	0	0	0	0	0	3	1	0	0	0	0	0	0	0	0	0	0	0	0
Crambidae	Spoladea	Spoladea recurvalis (Fabricius, 1775)	herb	generalist	0	0	0	0	0	0	0	0	0	0	0	0	0	0	0	1	1	0	0	2	0	1	0
Crambidae	Syllepte	Syllepte pallidinotalis_(Hampson, 1912)	woody	generalist	0	0	0	0	0	0	0	0	0	0	0	12	0	0	0	5	0	0	0	0	0	0	0
Crambidae	Syllepte	Syllepte segnalis_(Leech, 1889)	unknown	unknown	0	0	0	0	0	0	0	0	0	0	0	5	0	0	0	1	0	0	0	0	0	0	0
Crambidae	Torulisquama	Torulisquama obliquilinealis_Inoue, 1982	unknown	unknown	0	0	0	0	0	0	0	0	0	0	0	2	0	0	0	0	0	0	0	0	0	0	0
Crambidae	Tyspanodes	Tyspanodes striatus_(Butler, 1879)	woody	generalist	0	0	0	0	0	0	0	3	0	0	0	2	0	0	0	0	0	0	0	0	0	0	0
Crambidae	Udea	Udea lugubralis (Leech, 1889)	unknown	unknown	0	0	0	0	0	0	0	0	0	0	0	1	0	0	0	0	0	0	0	0	0	0	0
Crambidae	Uresiphita	Uresiphita gracilis_(Butler, 1879)	unknown	unknown	0	0	0	0	0	0	0	0	0	0	0	0	0	0	0	1	0	0	0	0	0	0	0
Crambidae	Xanthocrambus	Xanthocrambus lucellus (Herrich-Sch_ffer, 1848)	unknown	unknown	0	0	0	0	0	0	0	0	1	3	0	0	0	0	0	0	0	0	0	0	0	0	0
Depressariidae	Agonopterix	Agonopterix mutuurai Saito, 1980	herb	specialist	0	0	0	0	0	0	0	0	0	0	0	0	0	0	0	0	0	0	1	0	0	0	0
Depressariidae	Agonopterix	Agonopterix sumizome Fujisawa, 1985	herb	specialist	0	0	0	0	0	0	0	0	0	0	0	0	0	0	0	0	0	0	0	0	0	0	1
Depressariidae	Agonopterix	Agonopterix yomogiella Saito, 1980	herb	specialist	0	0	0	0	0	0	0	0	0	0	0	0	0	0	0	0	0	0	1	0	0	0	0
Drepanidae	Habrosyne	Habrosyne pyritoides (Butler, 1766)	woody	specialist	0	0	0	0	0	0	0	1	0	0	0	0	0	0	0	1	0	0	0	0	0	0	0
Drepanidae	Tethea	Tethea ampliata (Butler, 1878)	woody	specialist	0	0	0	0	0	0	0	0	0	0	0	1	0	0	0	0	0	0	0	0	0	0	0
Drepanidae	Thyatira	Thyatira batis (Linnaeus, 1758)	woody	specialist	0	0	0	0	0	0	0	2	0	0	0	2	0	0	0	0	0	0	0	0	0	0	0
Erebidae	Arctornis	Arctornis l-nigrum (M_ller, 1764)	woody	generalist	0	0	0	0	0	0	0	0	0	0	0	0	1	0	0	0	0	0	0	0	0	0	0
Erebidae	Artaxa	Artaxa subflava (Bremer, 1864)	herb/woody	generalist	0	0	0	0	0	0	0	0	3	1	0	1	0	0	1	1	0	0	0	0	0	0	0
Erebidae	Barsine	Barsine aberrans (Butler, 1877)	lichen/moss	generalist	0	0	0	0	0	0	0	0	2	0	0	0	0	0	0	0	0	0	0	0	0	0	0
Erebidae	Barsine	Barsine pulchra (Butler, 1877)	unknown	unknown	0	0	0	0	0	0	0	0	0	1	0	4	0	0	0	2	0	0	0	0	0	0	0
Erebidae	Barsine	Barsine striata (Bremer & Grey, 1853)	dead leaves	generalist	0	0	0	0	0	0	1	1	0	0	1	0	0	0	1	0	0	0	0	0	0	0	0
Erebidae	Chionarctia	Chinoarctia nivea (M_n_tri_s, 1859)	herb	generalist	0	0	0	0	0	0	0	0	4	2	3	53	2	6	3	3	0	0	0	0	0	0	0
Erebidae	Cifuna	Cifuna locuples Walker, 1855	herb/woody	generalist	0	0	0	0	0	0	0	0	0	0	0	0	0	0	0	2	0	0	0	0	0	0	0
Erebidae	Cyana	Cyana hamata (Walker, 1854)	lichen/moss	generalist	0	0	0	0	0	0	0	0	0	0	0	2	0	0	2	0	0	0	0	0	0	0	0
Erebidae	Eilema	Eilema affineola (Bremer, 1864)	unknown	unknown	0	0	0	0	0	0	0	0	0	0	0	11	1	0	4	1	0	3	0	0	0	0	0
Erebidae	Eilema	Eilema deplena (Esper, 1787)	lichen/moss	generalist	0	0	0	0	0	0	0	0	1	0	0	0	0	0	0	2	0	0	0	0	0	0	0
Erebidae	Eilema	Eilema japonica (Leech, 1889)	lichen/moss	generalist	0	0	0	0	0	0	0	0	0	0	0	0	2	0	0	0	0	0	0	0	0	0	0
Erebidae	Eilema	Eilema nankingica_(Daniel, 1954)	unknown	unknown	0	0	0	0	0	0	0	0	0	0	0	14	0	0	0	0	0	0	0	0	0	0	0
Erebidae	Eilema	Eilema vetusta (Walker, 1854)	lichen/moss	generalist	0	0	0	0	0	0	0	1	0	0	2	1	1	0	0	1	0	0	0	0	0	0	0
Erebidae	Epatolmis	Epatolmis caesarea (Goeze, 1781)	herb/woody	generalist	3	1	0	0	0	2	0	3	0	0	0	0	0	0	0	0	0	0	0	0	0	0	0
Erebidae	Ghoria	Ghoria collitoides Butler, 1885	unknown	unknown	0	0	0	0	4	2	2	2	0	0	0	0	0	0	0	0	0	0	0	0	0	0	0
Erebidae	Ghoria	Ghoria gigantea (Oberth_r, 1879)	woody	generalist	0	0	0	0	0	0	0	0	1	0	4	0	0	0	0	0	0	0	0	0	0	0	0
Erebidae	Ilema	Ilema eurydice (Butler, 1885)	woody	generalist	0	0	0	0	0	0	0	0	0	1	0	0	0	0	0	1	0	0	0	0	0	0	0
Erebidae	Kidokuga	Kidokuga piperita (Oberth_r, 1880)	woody	generalist	0	0	0	0	0	0	0	0	0	0	0	7	0	0	2	0	0	0	0	0	0	0	0
Erebidae	Lemyra	Lemyra imparilis_(Butler, 1877)	woody	generalist	0	0	0	0	0	0	0	0	0	0	0	2	0	0	0	0	0	0	0	0	0	0	0
Erebidae	Lemyra	Lemyra inaequalis (Butler, 1879)	woody	generalist	0	0	0	0	0	0	0	0	0	0	0	0	0	0	0	1	0	0	0	0	0	0	0
Erebidae	Lithosia_	Lithosia quadra_(Linnaeus, 1758)	lichen/moss	generalist	0	0	0	0	0	0	0	0	0	0	0	0	0	0	0	1	0	0	0	0	0	0	0
Erebidae	Lymantria	Lymantria mathura (Moore, 1865)	woody	generalist	0	0	0	0	0	0	0	14	0	0	0	2	1	0	0	0	0	0	0	0	0	0	0
Erebidae	Miltochrista	Miltochrista calamina Butler, 1877	woody	generalist	0	0	0	0	0	0	0	0	3	0	4	1	2	1	0	5	1	1	4	0	0	0	0
Erebidae	Miltochrista	Miltochrista miniata (Forster, 1771)	lichen/moss	generalist	0	0	0	0	0	0	0	0	3	0	1	1	0	0	0	0	0	0	0	0	0	0	0
Erebidae	Mimachrostia	Mimachrostia fasciata_Sugi, 1982	unknown	unknown	0	0	0	0	0	0	0	0	0	0	0	2	1	0	0	0	0	0	0	0	0	0	0
Erebidae	Orgyia	Orgyia thyellina Butler, 1881	herb/woody	generalist	0	0	0	0	0	0	0	0	0	0	0	0	1	0	0	0	1	0	0	0	0	0	0
Erebidae	Pelosia	Pelosia muscerda (Hufnagel, 1766)	lichen/moss	generalist	0	0	0	0	0	0	0	0	0	0	0	0	0	0	1	1	0	0	0	0	0	0	0
Erebidae	Pelosia	Pelosia noctis_(Butler, 1881)	lichen/moss	generalist	0	0	0	0	0	0	0	0	0	0	0	5	0	0	0	2	0	0	0	0	0	0	0
Erebidae	Pelosia	Pelosia obtusa (Herrich-Sch_ffer, 1852)	unknown	unknown	0	0	0	0	0	0	0	0	0	0	0	0	0	0	0	1	0	0	0	0	0	0	0
Erebidae	Phragmatobia	Phragmatobia amurensis Seitz, 1910	herb	generalist	0	0	0	0	0	0	0	0	0	0	0	0	0	0	0	1	0	0	0	0	0	0	0
Erebidae	Rhyparioides	Rhyparioides amurensis (Bremer, 1861)	herb	specialist	0	0	0	0	0	0	0	0	3	2	4	1	0	0	0	0	0	0	0	0	0	0	0
Erebidae	Rhyparioides	Rhyparioides metelkana (Lederer, 1861)	herb	generalist	0	0	0	0	0	0	0	0	0	0	0	0	0	0	0	25	0	1	0	0	0	0	0
Erebidae	Rhyparioides	Rhyparioides nebulosa Butler, 1877	herb	generalist	0	0	0	0	0	0	0	0	2	0	1	1	0	0	0	0	0	0	0	0	0	0	0
Erebidae	Sphrageidus	Sphrageidus similis (Fuessly, 1775)	woody	generalist	0	0	0	0	0	0	0	0	0	0	0	3	1	0	0	16	0	0	0	0	0	0	0
Erebidae	Spilarctia	Spilarctia lutea (Hufnagel, 1766)	unknown	unknown	0	0	0	0	0	0	0	3	0	0	0	0	0	0	0	0	0	0	0	0	0	0	0
Erebidae	Spilarctia	Spilarctia obliquizonata (Miyake, 1910)	woody	specialist	1	0	0	0	0	0	0	0	0	0	0	0	0	0	0	0	0	0	0	0	0	0	0
Erebidae	Spilarctia	Spilarctia seriatopunctata (Motschulsky, 1861)	woody	generalist	0	0	0	0	0	0	2	3	0	0	0	0	0	1	0	1	0	0	0	0	0	0	0
Erebidae	Spilosoma	Spilosoma lubricipedum (Linnaeus, 1758)	woody	generalist	0	0	0	0	0	0	0	2	0	0	0	1	0	0	0	0	0	0	0	0	0	0	0
Erebidae	Spilosoma	Spilosoma punctarium (Stoll, 1782)	woody	generalist	0	0	0	0	1	1	0	1	0	0	0	0	0	0	0	0	0	0	0	0	0	0	0
Erebidae	Stigmatophora	Stigmatophora rhodophila_(Walker, 1865)	lichen/moss	generalist	0	0	0	0	0	0	0	0	0	0	0	1	0	0	0	0	0	0	0	0	0	0	0
Erebidae	Thumatha	Thumatha ochracea (Bremer, 1861)	unknown	unknown	0	0	0	0	0	0	0	0	0	0	0	0	0	0	0	3	0	0	0	0	0	0	0
Eupterotidae	Apha	Apha aequalis (Felder,�@1874)	herb/woody	generalist	0	0	0	0	0	0	0	0	0	0	0	0	1	0	0	1	0	1	2	0	0	0	0
Geometridae	Abraxas	Abraxas fulvobasalis_Warren, 1894	woody	specialist	0	0	0	0	0	0	0	0	0	0	0	0	0	0	0	3	0	0	0	0	0	0	0
Geometridae	Abraxas	Abraxas miranda Butler, 1878	woody	specialist	0	0	0	0	0	0	0	1	0	0	0	0	0	0	0	3	0	0	0	0	0	0	0
Geometridae	Abraxas	Abraxas niphonibia Wehrli, 1935	woody	specialist	0	0	0	0	0	0	0	1	0	0	0	0	0	1	0	2	0	0	0	0	0	0	0
Geometridae	Acrodontis	Acrodontis fumosa (Prout, 1930)	woody	specialist	0	0	0	0	0	0	0	0	0	0	0	0	0	0	0	0	0	0	0	0	0	0	1
Geometridae	Amraica	Amraica superans (Butler, 1878)	woody	specialist	0	0	0	0	1	1	0	5	0	0	0	0	0	0	0	0	0	0	0	0	0	0	0
Geometridae	Arichanna	Arichanna melanaria (Linnaeus, 1758)	woody	specialist	0	0	0	0	0	0	0	0	0	0	0	1	0	0	0	0	0	0	0	0	0	0	0
Geometridae	Ascotis	Ascotis selenaria (Denis & Schifferm_ller, 1775)	herb/woody	generalist	0	0	0	0	0	0	0	16	0	0	0	0	0	0	0	0	0	0	0	0	0	0	0
Geometridae	Astygisa	Astygisa chlororphnodes (Wehrli, 1936)	woody	specialist	0	0	0	0	1	0	0	0	0	0	0	2	0	0	0	1	0	0	0	0	0	0	0
Geometridae	Chariaspilates	Chariaspilates formosaria (Eversmann, 1837)	herb/woody	generalist	0	0	0	0	0	0	0	0	1	6	3	0	0	0	0	0	0	0	0	0	0	0	0
Geometridae	Chiasmia	Chiasmia defixaria (Walker, 1861)	woody	specialist	0	1	0	0	0	0	0	0	0	0	0	0	0	0	0	0	0	0	0	0	0	0	0
Geometridae	Chiasmia	Chiasmia hebesata (Walker, 1861)	herb/woody	generalist	0	1	0	0	0	0	1	3	0	0	0	20	0	0	1	2	0	1	0	0	0	0	0
Geometridae	Chlorissa	Chlorissa amphitritaria (Oberth_r, 1879)	woody	generalist	0	0	0	0	0	0	0	0	0	0	0	0	0	0	1	1	0	0	0	0	0	0	0
Geometridae	Chlorissa	Chlorissa anadema_(Prout, 1930)	herb/woody	generalist	0	0	0	0	0	0	0	6	0	0	0	2	0	0	0	0	0	0	0	0	0	0	0
Geometridae	Chlorissa	Chlorissa obliterata_(Walker, 1863)	herb	generalist	0	0	0	0	0	0	0	1	0	0	0	2	0	0	0	0	0	0	0	0	0	0	0
Geometridae	Chloroclystis	Chloroclystis v-ata (Haworth, 1809)	herb/woody	generalist	0	0	0	0	0	0	0	0	1	0	0	3	0	0	1	0	0	0	0	0	0	0	0
Geometridae	Chloroclystis	Pasiphila excisa (Butler, 1878)	woody	generalist	0	0	0	0	1	0	0	0	0	0	0	0	0	0	1	0	0	0	0	0	0	0	0
Geometridae	Cleora	Cleora insolita_(Butler, 1878)	woody	generalist	0	0	0	0	0	0	0	7	0	0	0	0	0	0	0	0	0	0	0	0	0	0	0
Geometridae	Comibaena	Comibaena delicatior (Warren, 1897)	woody	generalist	0	0	0	0	0	0	0	0	0	0	0	1	0	0	0	2	0	0	1	0	0	0	0
Geometridae	Costaconvexa	Costaconvexa caespitaria (Christoph, 1881)	unknown	unknown	0	0	0	0	0	0	0	0	0	0	0	0	0	0	1	0	0	0	0	0	0	0	0
Geometridae	Culpinia	Culpinia diffusa_(Walker, 1861)	herb/woody	generalist	0	0	0	0	0	0	0	0	0	0	0	1	0	0	0	0	0	0	0	0	0	0	0
Geometridae	Cusiala	Cusiala stipitaria (Oberth_r, 1880)	woody	generalist	0	0	0	0	0	0	0	6	0	0	0	0	0	0	0	0	0	0	0	0	0	0	0
Geometridae	Descoreba	Descoreba simplex Butler, 1878	woody	generalist	0	0	0	1	0	0	0	0	0	0	0	0	0	0	0	0	0	0	0	0	0	0	0
Geometridae	Dindica	Dindica virescens (Butler, 1878)	woody	specialist	0	0	0	0	1	0	0	4	0	0	0	1	1	0	0	0	0	0	0	0	0	0	0
Geometridae	Ecliptopera	Ecliptopera capitata (Herrich-Sch_ffer, 1840)	woody	specialist	0	0	0	0	0	0	0	0	0	0	0	0	0	0	0	1	0	0	0	0	0	0	0
Geometridae	Ecliptopera	Ecliptopera umbrosaria (Motschulsky, 1861)	woody	specialist	0	0	0	0	0	0	0	5	0	0	0	0	0	0	0	2	0	0	0	0	0	0	0
Geometridae	Ecpetelia	Ecpetelia albifrontaria_(Leech, 1891)	woody	specialist	0	0	0	0	0	0	0	1	0	0	0	0	0	0	0	0	0	0	0	0	0	0	0
Geometridae	Ectropis	Ectropis excellens_(Butler, 1884)	herb/woody	generalist	0	0	0	0	0	0	0	0	0	0	0	1	0	0	0	0	0	0	0	0	0	0	0
Geometridae	Ectropis	Ectropis obliqua_(Prout, 1915)	herb/woody	generalist	0	0	0	1	0	0	0	0	0	0	0	1	0	0	0	0	0	0	0	0	0	0	0
Geometridae	Epirrhoe	Epirrhoe supergressa (Butler, 1878)	herb	specialist	0	0	0	0	0	0	0	1	0	0	0	0	0	0	0	0	0	0	0	0	0	0	0
Geometridae	Euphyia	Euphyia cineraria_(Butler, 1878)	unknown	unknown	0	0	0	0	0	0	0	0	0	0	0	0	0	0	0	1	0	0	0	0	0	0	0
Geometridae	Eupithecia	Eupithecia interpunctaria_Inoue, 1979	herb	specialist	0	0	0	0	0	0	0	0	0	0	0	0	0	0	0	5	0	0	0	0	0	0	0
Geometridae	Eupithecia	Eupithecia mandschurica_Staudinger, 1897	unknown	unknown	0	0	0	0	0	0	0	0	0	0	0	1	0	0	0	0	0	0	0	0	0	0	0
Geometridae	Eupithecia	Eupithecia neosatyrata_Inoue, 1979	woody	specialist	0	0	0	0	0	0	0	0	0	0	0	27	0	0	0	0	0	0	0	0	0	0	0
Geometridae	Evecliptopera	Evecliptopera illitata (Wileman, 1911)	woody	specialist	0	0	0	0	0	0	0	0	0	0	1	1	0	0	0	0	0	2	0	0	0	0	0
Geometridae	Gandaritis	Gandaritis fixseni (Bremer, 1864)	woody	generalist	0	0	0	0	0	0	0	0	0	0	1	0	0	0	0	0	0	0	0	0	0	0	0
Geometridae	Geometra	Geometra dieckmanni Graeser, 1889	woody	specialist	0	0	0	0	0	0	0	0	0	0	0	0	0	0	0	0	0	0	1	0	0	0	0
Geometridae	Heterophleps	Heterophleps fusca (Butler, 1878)	unknown	unknown	0	0	0	0	0	0	0	0	0	0	0	0	1	0	0	0	0	0	0	0	0	0	0
Geometridae	Heterothera	Heterothera postalbida_(Wileman, 1911)	woody	specialist	0	0	0	0	0	0	0	14	0	0	0	0	0	0	0	0	0	0	0	0	0	0	0
Geometridae	Hypomecis	Hypomecis punctinalis (Scopoli, 1763)	woody	generalist	0	0	0	0	0	0	0	0	0	0	0	3	0	0	0	2	0	0	0	0	0	0	0
Geometridae	Idaea	Idaea auricruda (Butler, 1879)	unknown	unknown	0	0	0	0	0	0	0	0	1	0	2	8	0	0	0	0	0	0	0	0	0	0	0
Geometridae	Idaea	Idaea denudaria_(Prout, 1913)	unknown	unknown	0	0	0	0	0	0	0	6	0	0	0	0	0	0	0	2	0	0	0	0	0	0	0
Geometridae	Idaea	Idaea invalida (Butler, 1879)	unknown	unknown	0	0	0	0	0	0	0	0	0	0	0	1	0	0	0	0	0	0	0	0	0	0	0
Geometridae	Idaea	Idaea jakima_(Butler, 1878)	unknown	unknown	0	0	0	0	0	0	0	0	0	0	0	0	0	0	0	9	0	0	0	0	0	0	0
Geometridae	Idaea	Idaea muricata (Hufnagel, 1767)	unknown	unknown	0	0	0	0	0	0	0	0	0	0	1	1	1	0	2	2	0	0	0	0	0	0	0
Geometridae	Idaea	Idaea nielseni (Hedemann, 1879)	unknown	unknown	0	0	0	0	0	0	0	0	0	0	0	0	0	1	0	0	0	0	0	0	0	0	0
Geometridae	Idaea	Idaea trisetata_(Prout, 1922)	unknown	unknown	0	0	0	0	0	0	0	0	0	0	0	0	0	0	0	6	0	0	0	0	0	0	0
Geometridae	Jankowskia	Jankowskia pseudathleta_Sato, 1980	woody	generalist	0	0	0	0	0	0	0	0	0	0	0	1	0	0	0	0	0	0	0	0	0	0	0
Geometridae	Lamprocabera	Lamprocabera candidaria (Leech, 1897)	woody	specialist	0	0	0	0	0	0	0	0	1	0	1	0	0	0	0	0	0	0	0	0	0	0	0
Geometridae	Lassaba	Lassaba nikkonis_(Butler, 1881)	woody	generalist	0	0	0	1	0	0	0	0	0	0	0	0	0	0	0	0	0	0	0	0	0	0	0
Geometridae	Lomographa	Lomographa bimaculata (Fabricius, 1775)	woody	specialist	0	0	0	0	0	0	0	0	0	1	0	0	0	0	0	0	0	0	0	0	0	0	0
Geometridae	Lomographa	Lomographa temerata (Denis & Schifferm_ller, 1775)	woody	specialist	0	0	0	1	2	0	0	1	2	0	2	2	2	1	0	1	0	0	0	0	0	0	0
Geometridae	Macaria	Macaria liturata (Clerck, 1759)	woody	specialist	0	0	0	0	0	0	0	0	0	0	3	0	0	0	0	0	0	0	0	0	0	0	0
Geometridae	Macaria	Macaria shanghaisaria Walker, 1861	woody	specialist	0	0	0	0	0	0	0	2	0	0	0	0	0	0	0	0	0	0	0	0	0	0	0
Geometridae	Menophra	Menophra senilis (Butler, 1878)	herb/woody	generalist	2	0	0	0	0	0	0	8	0	0	0	4	0	0	0	0	0	0	0	0	0	0	0
Geometridae	Metabraxas	Metabraxas clerica Butler, 1881	unknown	unknown	0	0	0	0	0	0	0	2	0	0	0	0	1	0	0	1	0	0	0	0	0	0	0
Geometridae	Microcalicha	Microcalicha sordida_(Butler, 1878)	woody	specialist	0	0	0	0	0	0	0	4	0	0	0	0	0	0	0	0	0	0	0	0	0	0	0
Geometridae	Ninodes	Ninodes splendens_(Butler, 1878)	woody	specialist	0	0	0	0	0	0	0	2	0	0	0	0	0	0	0	0	0	0	0	0	0	0	0
Geometridae	Orthonama	Orthonama obstipata_(Fabricius, 1794)	herb/woody	generalist	0	0	0	0	0	0	0	2	0	0	0	0	0	0	0	0	0	0	0	0	0	0	0
Geometridae	Otoplecta	Otoplecta frigida_(Butler, 1878)	woody	specialist	0	0	0	1	0	0	0	0	0	0	0	0	0	0	0	0	0	0	0	0	0	0	0
Geometridae	Ourapteryx	Ourapteryx maculicaudaria_(Motschulsky, 1866)	woody	generalist	0	0	0	0	0	0	0	0	0	0	0	1	0	0	0	0	0	0	0	0	0	0	0
Geometridae	Oxymacaria	Oxymacaria normata (Alph_raky, 1892)	woody	specialist	0	0	0	0	0	0	0	2	0	0	0	0	0	0	0	0	0	0	0	0	0	0	0
Geometridae	Pachista	Pachista superans (Butler, 1878)	woody	specialist	0	0	0	0	0	0	0	0	0	0	0	0	1	0	1	0	0	1	0	0	0	0	0
Geometridae	Peratophyga	Peratophyga hyalinata (Kollar, 1844)	herb	specialist	0	0	0	0	0	0	0	3	0	0	0	2	0	0	0	2	0	0	0	0	0	0	0
Geometridae	Petelia	Petelia rivulosa_(Butler, 1881)	woody	specialist	0	0	0	0	0	0	0	0	0	0	0	1	0	0	0	0	0	0	0	0	0	0	0
Geometridae	Petrophora	Petrophora chlorosata (Scopoli, 1763)	herb	specialist	0	0	0	0	3	1	2	7	0	0	0	2	0	0	0	0	0	0	0	0	0	0	0
Geometridae	Phthonosema	Phthonosema tendinosaria (Bremer, 1864)	herb/woody	generalist	0	0	0	0	0	0	0	0	1	1	1	7	0	0	0	1	0	0	0	0	0	0	0
Geometridae	Pingasa	Pingasa alba Swinhoe, 1891	woody	specialist	0	0	0	0	2	0	0	0	0	0	0	0	0	0	0	0	0	0	0	0	0	0	0
Geometridae	Pingasa	Pingasa pseudoterpnaria (Guen_e, 1857)	woody	specialist	0	0	0	0	0	0	0	4	0	0	0	0	0	0	0	0	0	0	0	0	0	0	0
Geometridae	Protoboarmia	Protoboarmia faustinata_(Warren, 1897)	woody	generalist	0	0	0	0	0	0	0	19	0	0	0	0	0	0	0	0	0	0	0	0	0	0	0
Geometridae	Protoboarmia	Protoboarmia simpliciaria (Leech, 1897)	woody	generalist	0	0	0	0	0	0	0	0	0	0	0	0	1	0	0	0	0	0	0	0	0	0	0
Geometridae	Pseuderannis	Pseuderannis lomozemia_(Prout, 1930)	woody	generalist	0	0	0	3	0	0	0	0	0	0	0	0	0	0	0	0	0	0	0	0	0	0	0
Geometridae	Pylargosceles	Pylargosceles steganioides (Butler, 1878)	herb/woody	generalist	0	0	0	0	0	0	0	2	0	0	0	1	0	0	0	0	0	0	0	0	0	0	0
Geometridae	Racotis	Racotis petrosa_(Butler, 1879)	woody	specialist	0	0	0	0	0	0	0	0	0	0	0	1	0	0	0	0	0	0	0	0	0	0	0
Geometridae	Scopula	Scopula floslactata (Haworth, 1809)	herb	generalist	0	0	0	0	0	0	0	0	0	0	0	0	1	0	0	0	0	0	0	0	0	0	0
Geometridae	Scopula	Scopula ignobilis_(Warren, 1901)	herb/woody	generalist	0	0	0	0	0	0	0	0	0	0	0	1	0	0	0	1	0	0	0	0	0	0	0
Geometridae	Scopula	Scopula impersonata (Walker, 1861)	herb	specialist	0	0	0	0	0	0	0	1	0	0	0	0	0	0	0	0	0	0	0	0	0	0	0
Geometridae	Scopula	Scopula nigropunctata (Hufnagel, 1767)	herb/woody	generalist	0	0	0	0	0	0	0	0	0	0	0	0	0	0	0	2	0	0	0	0	0	0	0
Geometridae	Scopula	Scopula nupta (Butler, 1878)	unknown	unknown	0	0	0	0	0	0	0	0	0	0	0	0	0	0	0	2	0	0	0	0	0	0	0
Geometridae	Scopula	Scopula pudicaria (Motschulsky, 1861)	herb	specialist	0	0	0	0	0	0	0	0	0	0	1	0	0	0	0	0	0	0	0	0	0	0	0
Geometridae	Scopula	Scopula semignobilis_Inoue, 1942	herb	specialist	0	0	0	0	0	0	0	0	0	0	0	0	0	0	0	1	0	0	0	0	0	0	0
Geometridae	Spilopera	Spilopera debilis (Butler, 1878)	woody	specialist	1	0	0	0	0	0	1	4	0	1	0	1	0	0	2	0	0	0	0	0	0	0	0
Geometridae	Trichopteryx	Trichopteryx ussurica (Wehrli, 1927)	unknown	unknown	0	0	0	0	1	0	0	0	0	0	0	0	0	0	0	0	0	0	0	0	0	0	0
Geometridae	Tyloptera	Tyloptera bella (Butler, 1878)	woody	specialist	0	0	0	0	0	0	0	1	0	0	0	2	1	0	0	1	0	0	0	0	0	0	0
Geometridae	Xanthorhoe	Xanthorhoe biriviata (Borkhausen, 1794)	herb	specialist	1	0	0	0	0	0	0	1	0	0	0	0	0	0	0	1	0	0	0	0	0	0	0
Geometridae	Xerodes	Xerodes albonotaria (Bremer, 1864)	herb/woody	generalist	0	0	0	1	0	0	0	0	0	0	0	0	0	0	0	0	0	0	0	0	0	0	0
Geometridae	Xerodes	Xerodes rufescentara (Motschulsky, 1861)	woody	generalist	0	0	0	5	0	0	0	4	0	0	0	0	0	0	0	0	0	0	0	0	0	0	0
Geometridae	Xerodes	Xerodes semilutata (Lederer, 1853)	woody	specialist	0	0	0	1	1	0	1	1	0	0	0	8	1	1	1	0	0	0	0	0	0	0	0
Lasiocampidae	Dendrolimus	Dendrolimus spectabilis_(Butler, 1877)	woody	specialist	0	0	0	0	0	0	0	0	0	0	0	3	0	0	0	0	0	0	0	0	0	0	0
Lasiocampidae	Euthrix	Euthrix albomaculata (Bremer, 1861)	herb	specialist	0	0	0	0	0	0	0	0	0	0	0	5	0	0	0	0	0	0	0	0	0	0	0
Lasiocampidae	Euthrix	Euthrix potatoria (Linnaeus, 1758)	herb/woody	generalist	0	0	0	0	0	0	0	0	0	0	0	8	1	1	0	0	0	0	0	0	0	0	0
Lasiocampidae	Kunugia	Kunugia undans (Walker, 1859)	woody	generalist	0	0	0	0	0	0	0	0	0	0	0	0	0	0	0	0	0	0	0	0	3	4	13
Lasiocampidae	Malacosoma	Malacosoma neustrium (Linnaeus, 1758)	woody	generalist	0	0	0	0	0	0	0	0	0	0	0	16	0	0	0	0	0	0	0	0	0	0	0
Limacodidae	Narosoideus	Narosoideus flavidorsalis (Staudinger, 1887)	woody	generalist	0	0	0	0	0	0	0	0	1	0	1	8	0	0	0	0	0	0	0	0	0	0	0
Limacodidae	Parasa	Parasa consocia_Walker, 1863	woody	generalist	0	0	0	0	0	0	0	0	0	0	0	3	0	0	0	0	0	0	0	0	0	0	0
Limacodidae	Parasa	Parasa hilarula (Staudinger, 1887)	woody	generalist	0	0	0	0	0	0	0	5	0	0	1	2	1	0	0	1	0	0	0	0	0	0	0
Limacodidae	Phlossa	Phlossa conjuncta_(Walker, 1855)	unknown	unknown	0	0	0	0	0	0	0	0	0	0	0	1	0	0	0	0	0	0	0	0	0	0	0
Noctuidae	Abrostola	Abrostola ussuriensis_Dufay, 1958	unknown	unknown	0	0	0	0	0	0	0	7	0	0	0	0	0	0	0	0	0	0	0	0	0	0	0
Noctuidae	Acronicta	Acronicta hercules (Felder & Rogenhofer, 1874)	woody	specialist	0	0	0	0	0	0	0	0	0	0	0	0	0	0	0	0	0	1	0	0	0	0	0
Noctuidae	Actinotia	Actinotia intermediata_(Bremer, 1861)	herb	specialist	0	0	0	0	0	0	0	1	0	0	0	0	0	0	0	0	0	0	0	0	0	0	0
Noctuidae	Adrapsa	Adrapsa simplex_(Butler, 1879)	dead leaves	generalist	0	0	0	0	0	0	0	0	0	0	0	2	0	0	0	0	0	0	0	0	0	0	0
Noctuidae	Agrotis	Agrotis exclamationis (Linnaeus, 1758)	herb	generalist	0	0	0	0	0	5	2	2	0	0	0	0	0	0	0	0	0	0	0	0	0	0	0
Noctuidae	Agrotis	Agrotis ipsilon (Hufnagel, 1766)	herb/woody	generalist	0	0	0	0	0	0	0	0	0	0	0	0	0	1	0	0	0	0	0	0	0	0	0
Noctuidae	Agrotis	Agrotis segetum_(Denis & Schifferm_ller, 1775)	herb	generalist	0	0	0	0	0	0	0	105	0	0	0	0	0	0	0	0	0	0	0	0	0	0	0
Noctuidae	Amphipoea	Amphipoea ussuriensis_(Petersen, 1914)	unknown	unknown	0	0	0	0	0	0	0	0	0	0	0	1	0	0	0	0	0	0	0	0	0	0	0
Noctuidae	Amphipyra	Amphipyra pyramidea (Linnaeus, 1758)	woody	generalist	0	0	0	0	0	0	0	0	0	0	0	2	0	0	0	1	0	0	0	0	0	0	0
Noctuidae	Anachrostis	Anachrostis nigripunctalis (Wileman, 1911)	woody	specialist	0	0	0	0	0	0	0	0	0	0	0	5	0	0	0	5	1	0	0	0	0	0	0
Noctuidae	Anacronicta	Anacronicta caliginea_(Butler, 1881)	herb	specialist	0	0	0	0	0	0	0	17	0	0	0	0	0	0	0	1	0	0	0	0	0	0	0
Noctuidae	Anacronicta	Anacronicta nitida_(Butler, 1878)	herb	specialist	0	0	0	0	0	0	0	1	0	0	0	0	0	0	0	0	0	0	0	0	0	0	0
Noctuidae	Anapamea	Anapamea incerta_(Staudinger, 1892)	unknown	unknown	0	0	0	0	0	0	0	0	0	0	0	3	0	0	0	0	0	0	0	0	0	0	0
Noctuidae	Anaplectoides	Anaplectoides virens_(Butler, 1878)	herb	specialist	0	0	0	0	0	0	0	0	0	0	0	0	0	0	0	1	0	0	0	0	0	0	0
Noctuidae	Anarta	Anarta (Calocestra) trifolii (Hufnagel, 1766)	herb	generalist	0	0	0	0	0	0	0	0	0	0	0	0	0	0	1	0	0	0	0	0	0	0	0
Noctuidae	Anorthoa	Anorthoa angustipennis_(Matsumura, 1926)	woody	generalist	0	0	0	3	0	0	0	0	0	0	0	0	0	0	0	0	0	0	0	0	0	0	0
Noctuidae	Apamea	Apamea aquila_(Donzel, 1837)	unknown	unknown	0	0	0	0	0	0	0	29	0	0	0	0	0	0	0	0	0	0	0	0	0	0	0
Noctuidae	Apamea	Apamea hampsoni Sugi, 1963	unknown	unknown	0	0	0	0	3	0	0	22	0	0	0	0	0	0	0	0	0	0	0	0	0	0	0
Noctuidae	Apamea	Apamea sordens (Hufnagel, 1766)	herb	specialist	0	0	0	0	0	0	2	0	0	0	0	0	0	0	0	0	0	0	0	0	0	0	0
Noctuidae	Archanara	Archanara resoluta_Hampson, 1910	herb	specialist	0	0	0	0	0	0	0	0	0	0	0	2	0	0	0	0	0	0	0	0	0	0	0
Noctuidae	Athetis	Athetis albisignata_(Oberth_r, 1879)	herb	generalist	0	0	0	0	0	0	0	1	0	0	0	7	0	0	0	8	0	0	0	0	0	0	0
Noctuidae	Athetis	Athetis cinerascens_(Motschulsky, 1861)	unknown	unknown	0	0	0	4	0	0	0	0	0	0	0	0	0	0	0	0	0	0	0	0	0	0	0
Noctuidae	Athetis	Athetis dissimilis_(Hampson, 1909)	herb	generalist	0	0	0	0	0	0	0	1	0	0	0	1	0	0	0	25	0	0	0	0	0	0	0
Noctuidae	Athetis	Athetis lapidea Wileman, 1911	unknown	unknown	0	0	0	0	0	0	0	0	2	1	1	9	0	0	0	0	0	0	0	0	0	0	0
Noctuidae	Athetis	Athetis lineosa_(Moore, 1881)	herb	generalist	0	0	0	0	0	0	0	98	0	0	0	2	0	0	0	5	0	0	0	0	0	0	0
Noctuidae	Athetis	Athetis stellata (Moore, 1882)	herb	generalist	0	0	0	0	0	0	0	3	0	0	0	2	1	1	1	15	0	0	0	0	0	0	0
Noctuidae	Aventiola	Aventiola pusilla_(Butler, 1879)	lichen/moss	generalist	0	0	0	0	0	0	0	0	0	0	0	1	0	0	0	0	0	0	0	0	0	0	0
Noctuidae	Axylia	Axylia putris (Linnaeus, 1761)	herb	generalist	0	0	0	0	0	0	0	19	0	0	0	6	0	1	0	11	0	0	0	0	0	0	0
Noctuidae	Bambusiphila	Bambusiphila vulgaris_(Butler, 1886)	herb	specialist	0	0	0	0	0	0	0	0	0	0	0	1	0	0	0	0	0	0	0	0	0	0	0
Noctuidae	Blasticorhinus	Blasticorhinus ussuriensis (Bremer, 1861)	herb/woody	generalist	0	0	0	0	0	0	0	0	0	0	0	2	13	8	14	27	0	0	0	0	0	0	0
Noctuidae	Bomolocha	Bomolocha melanica_Sugi, 1959	unknown	unknown	0	0	0	0	0	0	0	0	0	0	0	4	0	0	0	0	0	0	0	0	0	0	0
Noctuidae	Bomolocha	Bomolocha stygiana (Butler, 1878)	woody	specialist	0	0	0	0	0	0	1	1	0	0	0	1	0	0	0	0	0	0	0	0	0	0	0
Noctuidae	Bomolocha	Bomolocha zilla_(Butler, 1879)	unknown	unknown	0	0	0	0	0	0	0	1	0	0	0	0	0	0	0	0	0	0	0	0	0	0	0
Noctuidae	Callopistria	Callopistria juventina (Stoll, 1782)	herb	generalist	0	0	0	0	0	0	0	0	4	4	0	7	1	3	0	3	1	1	0	0	0	0	0
Noctuidae	Callopistria	Callopistria placodoides_(Guen_e, 1852)	herb	generalist	0	0	0	0	0	0	0	0	0	0	0	1	0	0	0	0	0	3	0	0	0	0	0
Noctuidae	Callopistria	Callopistria repleta Walker, 1858	herb	generalist	0	0	0	0	1	0	0	0	0	0	0	0	0	0	0	0	0	0	0	0	0	0	0
Noctuidae	Calyptra	Calyptra thalictri (Borkhausen, 1790)	herb	specialist	0	0	0	0	0	0	0	0	0	0	0	0	0	0	2	5	0	1	0	0	0	0	0
Noctuidae	Catocala	Catocala duplicata_Butler, 1885	woody	specialist	0	0	0	0	0	0	0	0	0	0	0	1	0	0	0	0	0	0	0	0	0	0	0
Noctuidae	Catocala	Catocala nagioides_Wileman, 1924	woody	specialist	0	0	0	0	0	0	0	0	0	0	0	1	0	0	0	0	0	0	0	0	0	0	0
Noctuidae	Catocala	Catocala nubila_Butler, 1881	woody	specialist	0	0	0	0	0	0	0	0	0	0	0	0	0	0	0	1	0	0	0	0	0	0	0
Noctuidae	Cerastis	Cerastis pallescens (Butler, 1878)	woody	generalist	1	0	0	0	0	0	0	0	0	0	0	0	0	0	0	0	0	0	0	0	0	0	0
Noctuidae	Chandata	Chandata bella (Butler, 1881)	herb	specialist	0	0	0	0	0	0	0	0	0	0	0	0	0	0	0	0	0	0	1	0	0	0	0
Noctuidae	Chasminodes	Chasminodes sugii_Kononenko, 1981	woody	specialist	0	0	0	0	0	0	0	0	0	0	0	2	0	0	0	0	0	0	0	0	0	0	0
Noctuidae	Chrysodeixis	Chrysodeixis acuta (Walker, 1857)	herb/woody	generalist	0	0	0	1	0	0	0	0	0	0	0	0	0	0	0	0	0	0	0	0	0	0	0
Noctuidae	Chrysorithrum	Chrysorithrum amatum (Bremer & Grey, 1853)	woody	specialist	0	0	0	0	0	0	0	0	0	0	2	1	0	0	0	1	0	0	0	0	0	0	0
Noctuidae	Chytonix	Chytonix subalbonotata_Sugi, 1959	unknown	unknown	0	0	0	0	0	0	0	0	0	0	0	0	0	1	0	0	0	1	0	0	0	0	0
Noctuidae	Cidariplura	Cidariplura gladiata_Butler, 1879	unknown	unknown	0	0	0	0	0	0	0	0	0	0	0	4	0	0	0	0	0	0	0	0	0	0	0
Noctuidae	Clavipalpula	Clavipalpula aurariae_(Oberth_r, 1880)	woody	generalist	0	0	0	0	0	0	0	3	0	0	0	0	0	0	0	0	0	0	0	0	0	0	0
Noctuidae	Conistra	Conistra grisescens_Draudt, 1950	woody	generalist	0	0	0	1	0	0	0	0	0	0	0	0	0	0	0	0	0	0	0	0	0	0	0
Noctuidae	Corgatha	Corgatha nitens (Butler, 1879)	lichen/moss	generalist	0	0	0	0	0	0	0	0	0	0	0	0	1	0	0	0	0	0	0	0	0	0	0
Noctuidae	Cosmia	Cosmia trapezina (Linnaeus, 1758)	woody	generalist	0	0	0	0	0	0	0	0	0	0	0	1	0	0	0	1	0	0	0	0	0	0	0
Noctuidae	Cryphia	Cryphia mitsuhashi_(Marumo, 1917)	lichen/moss	generalist	0	0	0	0	0	0	0	0	0	0	0	1	0	0	0	5	0	0	0	0	0	0	0
Noctuidae	Ctenoplusia	Acanthoplusia agnata (Staudinger, 1892)	herb	generalist	0	0	0	0	0	0	0	0	0	0	0	0	0	0	0	0	0	1	0	0	0	0	0
Noctuidae	Cucullia	Cucullia perforata Bremer, 1861	herb	specialist	0	0	0	0	0	0	0	0	0	0	0	0	1	0	0	0	0	0	0	0	0	0	0
Noctuidae	Diarsia	Diarsia canescens (Butler, 1878)	herb	generalist	0	0	0	0	0	0	0	7	0	0	0	0	0	0	0	1	0	1	1	1	5	2	0
Noctuidae	Diarsia	Diarsia deparca (Butler, 1879)	herb	generalist	0	0	0	0	0	0	0	0	0	0	0	0	0	0	0	0	0	0	0	0	0	0	1
Noctuidae	Diarsia	Diarsia pacifica Boursin, 1943	herb	generalist	0	0	0	0	0	0	0	0	0	0	0	2	0	0	0	2	0	0	0	0	0	0	0
Noctuidae	Diarsia	Diarsia ruficauda (Warren, 1909)	herb	generalist	0	0	0	0	0	0	0	3	0	0	0	0	0	0	0	0	0	0	0	0	0	0	0
Noctuidae	Diomea	Diomea cremata (Butler, 1878)	lichen/moss	generalist	0	0	0	0	0	0	0	0	0	0	0	0	0	0	1	0	0	0	0	0	0	0	0
Noctuidae	Dipterygina	Dipterygina cupreotincta_Sugi, 1954	herb	specialist	0	0	0	0	0	0	0	1	0	0	0	0	0	0	0	0	0	0	0	0	0	0	0
Noctuidae	Dypterygia	Dypterygia andreji_Kardakoff, 1928	herb	specialist	0	0	0	0	0	0	0	12	0	0	0	0	0	0	0	0	0	0	0	0	0	0	0
Noctuidae	Ercheia	Ercheia niveostrigata Warren, 1913	herb	specialist	0	0	0	0	0	0	0	17	0	0	0	0	0	1	0	0	0	0	0	0	0	0	0
Noctuidae	Ercheia	Ercheia umbrosa_Butler, 1881	woody	specialist	0	0	0	0	0	0	0	0	0	0	0	1	0	0	0	0	0	0	0	0	0	0	0
Noctuidae	Ericeia	Ericeia pertendens (Walker, 1858)	woody	specialist	1	0	0	0	0	0	0	0	0	0	0	0	0	0	0	0	0	0	0	0	0	0	0
Noctuidae	Erygia	Erygia apicalis_Guen_e, 1852	herb/woody	specialist	0	0	0	0	0	0	0	0	0	0	0	0	0	1	0	0	0	0	0	0	0	0	0
Noctuidae	Euplexia	Euplexia lucipara_(Linnaeus, 1758)	herb	generalist	0	0	0	0	0	0	0	0	0	0	0	0	1	0	0	0	1	7	0	0	0	0	0
Noctuidae	Eutelia	Eutelia geyeri (Felder & Rogenhofer, 1874)	woody	generalist	0	0	0	0	0	0	0	0	0	0	0	0	0	0	0	0	0	1	0	0	0	0	0
Noctuidae	Euxoa	Euxoa karschi_(Graeser, 1889)	herb	specialist	0	0	0	0	0	0	0	0	0	0	0	1	0	0	0	0	0	0	0	0	0	0	0
Noctuidae	Euxoa	Euxoa sibirica_(Boisduval, 1832)	herb	generalist	0	0	0	0	0	0	0	0	0	0	0	0	0	0	0	1	0	0	0	0	0	0	0
Noctuidae	Gonitis	Gonitis mesogona (Walker, 1858)	woody	generalist	0	0	0	0	0	0	0	2	0	0	0	0	0	0	0	10	0	0	0	0	0	0	0
Noctuidae	Gortyna	Gortyna basalipunctata Graeser, 1889	unknown	unknown	0	0	0	0	0	0	0	0	0	0	0	0	0	0	0	0	1	1	0	0	0	0	0
Noctuidae	Gortyna	Gortyna fortis_(Butler, 1878)	herb	generalist	0	0	0	0	0	0	0	0	0	0	0	0	0	0	0	1	0	0	0	0	0	0	0
Noctuidae	Gynaephila	Gynaephila maculifera_Staudinger, 1892	lichen/moss	generalist	0	0	0	0	0	0	0	0	0	0	0	0	0	0	0	7	0	0	0	0	0	0	0
Noctuidae	Harita	Harita belinda_(Butler, 1879)	woody	specialist	0	0	0	1	0	0	0	2	0	0	0	1	0	0	0	1	0	0	0	0	0	0	0
Noctuidae	Heliothis	Heliothis maritima Graslin, 1855	herb	generalist	0	0	0	0	0	0	0	0	0	0	0	0	0	1	0	0	0	3	0	0	0	0	0
Noctuidae	Herminia	Herminia arenosa_Butler, 1878	dead leaves	generalist	0	0	0	0	0	0	0	2	0	0	0	4	0	0	0	1	0	0	0	0	0	0	0
Noctuidae	Herminia	Herminia grisealis_(Denis & Schifferm_ller, 1775)	dead leaves	generalist	0	0	0	0	0	0	0	5	0	0	0	1	0	0	0	0	0	0	0	0	0	0	0
Noctuidae	Herminia	Herminia tarsicrinalis_(Knoch, 1782)	dead leaves	generalist	0	0	0	0	0	0	0	0	0	0	0	1	0	0	0	1	0	0	0	0	0	0	0
Noctuidae	Holocryptis	Holocryptis ussuriensis_(Rebel, 1901)	unknown	unknown	0	0	0	0	0	0	0	19	0	0	0	0	0	0	0	2	0	0	0	0	0	0	0
Noctuidae	Honeyania	Honeyania ragusana_(Freyer, 1844)	unknown	unknown	0	0	0	0	0	0	0	0	0	0	0	0	0	0	0	36	0	0	0	0	0	0	0
Noctuidae	Hydraecia	Hydraecia petasitis_Doubleday, 1847	herb	generalist	0	0	0	0	0	0	0	0	0	0	0	2	0	0	0	1	0	0	0	0	0	0	0
Noctuidae	Hydrillodes	Hydrillodes morosa (Butler, 1879)	dead leaves	generalist	1	0	0	0	0	0	0	2	2	2	5	88	0	0	1	0	0	0	0	0	0	0	0
Noctuidae	Hypena	Hypena amica (Butler, 1878)	herb	specialist	0	0	0	0	0	0	0	0	0	0	0	0	1	0	0	0	0	0	0	0	0	0	0
Noctuidae	Hypena	Hypena kengkalis_Bremer, 1864	woody	specialist	0	0	0	2	0	0	0	3	0	0	0	1	0	0	0	0	0	0	0	0	0	0	0
Noctuidae	Hypena	Hypena sp.	unknown	unknown	0	0	0	0	0	0	0	0	0	0	0	0	0	0	2	0	0	1	1	0	0	0	0
Noctuidae	Hypena	Hypena tristalis Lederer, 1853	herb/woody	generalist	0	0	0	0	0	0	0	1	0	0	0	0	0	0	1	0	1	2	1	0	0	0	0
Noctuidae	Hypena	Hypena whitelyi_(Butler, 1879)	unknown	unknown	0	0	0	0	0	0	0	4	0	0	0	0	0	0	0	0	0	0	0	0	0	0	0
Noctuidae	Hyperstrotia	Hyperstrotia flavipuncta (Leech, 1889)	dead leaves	generalist	0	0	0	0	0	0	0	2	0	0	0	22	1	2	4	1	0	0	0	0	0	0	0
Noctuidae	Iambia	Iambia japonica Sugi, 1958	unknown	unknown	0	0	0	0	0	0	0	0	1	0	0	2	0	0	0	2	0	0	0	0	0	0	0
Noctuidae	Idia	Idia curvipalpis_(Butler, 1879)	dead leaves	generalist	0	0	0	0	0	0	0	0	0	0	0	1	0	0	0	0	0	0	0	0	0	0	0
Noctuidae	Koyaga	Koyaga falsa (Butler, 1885)	herb	specialist	0	0	0	0	0	0	0	0	0	0	0	0	0	2	1	0	0	0	1	0	0	0	0
Noctuidae	Koyaga	Koyaga numisma_(Staudinger, 1888)	unknown	unknown	0	0	0	0	0	0	0	0	0	0	0	0	0	0	0	1	0	0	0	0	0	0	0
Noctuidae	Leucapamea	Leucapamea kawadai_(Sugi, 1955)	unknown	unknown	0	0	0	0	0	0	0	0	0	0	0	0	0	0	0	1	0	0	0	0	0	0	0
Noctuidae	Lygephila	Lygephila maxima_(Bremer, 1861)	herb	generalist	0	0	0	0	0	0	0	0	0	0	0	0	0	0	0	2	0	0	0	0	0	0	0
Noctuidae	Mamestra	Mamestra brassicae_(Linnaeus, 1758)	herb	generalist	0	0	0	0	0	0	0	0	0	0	0	0	0	0	0	1	0	0	0	0	0	0	0
Noctuidae	Melapia	Melapia electaria_(Bremer, 1864)	herb	specialist	0	0	0	0	0	0	0	1	0	0	0	0	0	0	0	0	0	0	0	0	0	0	0
Noctuidae	Metopta	Metopta rectifasciata (M_n_tri_s, 1863)	herb	specialist	4	0	0	0	0	0	1	6	0	0	0	0	0	0	0	0	0	0	0	0	0	0	0
Noctuidae	Micardia	Micardia argentata Butler, 1878	herb	specialist	0	0	0	0	1	0	0	0	0	0	0	0	0	0	0	0	0	0	0	0	0	0	0
Noctuidae	Micreremites	Micreremites pyraloides_Sugi, 1982	unknown	unknown	0	0	0	0	0	0	0	0	0	0	0	1	0	0	0	0	0	0	0	0	0	0	0
Noctuidae	Microxyla	Microxyla confusa (Wileman, 1911)	herb	specialist	0	0	0	0	0	0	0	0	0	0	0	9	0	0	0	0	0	0	0	0	0	0	0
Noctuidae	Mocis	Mocis ancilla_(Warren, 1913)	herb	specialist	0	0	0	0	0	0	0	1	0	0	0	0	0	0	0	2	0	0	0	0	0	0	0
Noctuidae	Mocis	Mocis annetta (Butler, 1878)	herb/woody	specialist	0	0	0	0	0	0	0	0	0	1	0	1	0	0	0	0	0	0	0	0	0	0	0
Noctuidae	Mosopia	Mosopia sordidum_(Butler, 1879)	unknown	unknown	0	0	0	0	0	0	0	0	0	0	0	10	0	0	0	1	0	0	0	0	0	0	0
Noctuidae	Mythimna	Mythimna chosenicola_(Bryk, 1949)	unknown	unknown	0	0	0	0	0	0	0	0	0	0	0	8	0	0	0	0	0	0	0	0	0	0	0
Noctuidae	Mythimna	Mythimna flavostigma (Bremer, 1861)	unknown	unknown	0	0	0	0	0	0	0	2	0	0	0	1	0	0	2	2	0	1	0	0	0	0	0
Noctuidae	Mythimna	Mythimna inanis (Oberth_r, 1880)	unknown	unknown	1	0	0	0	1	0	2	21	0	0	0	0	0	0	0	0	0	0	0	0	0	0	0
Noctuidae	Mythimna	Mythimna matsumuriana_(Bryk, 1949)	herb	specialist	0	0	0	0	0	0	0	0	0	0	0	0	0	0	0	2	0	0	0	0	0	0	0
Noctuidae	Mythimna	Mythimna obsoleta_(H_bner, 1803)	unknown	unknown	0	0	0	0	0	0	0	1	0	0	0	0	0	0	0	0	0	0	0	0	0	0	0
Noctuidae	Mythimna	Mythimna pallens_(Linnaeus, 1758)	herb	generalist	0	0	0	0	0	0	0	1	0	0	0	0	0	0	0	0	0	0	0	0	0	0	0
Noctuidae	Mythimna	Mythimna postica_(Hampson, 1905)	herb	specialist	0	0	0	0	0	0	0	1	0	0	0	1	0	0	0	0	0	0	0	0	0	0	0
Noctuidae	Mythimna	Mythimna pudorina (Denis & Schifferm_ller, 1775)	herb	generalist	0	0	0	0	0	0	0	0	1	0	0	0	0	0	0	0	0	0	0	0	0	0	0
Noctuidae	Mythimna	Mythimna radiata_(Bremer, 1861)	unknown	unknown	0	0	0	0	0	0	0	0	0	0	0	2	0	0	0	1	0	0	0	0	0	0	0
Noctuidae	Mythimna	Mythimna rufipennis Butler, 1878	unknown	unknown	0	0	0	0	0	0	0	5	0	0	0	0	0	1	1	1	0	0	0	0	0	0	0
Noctuidae	Mythimna	Mythimna separata (Walker, 1865)	herb	generalist	0	0	0	0	0	0	0	0	0	0	0	1	0	0	0	1	0	0	0	0	0	0	0
Noctuidae	Mythimna	Mythimna turca (Linnaeus, 1761)	herb	generalist	0	0	0	0	0	0	0	1	0	0	0	0	1	1	3	0	1	1	0	0	0	0	0
Noctuidae	Naranga	Naranga aenescens_Moore, 1881	herb	specialist	0	0	0	0	0	0	0	0	0	0	0	25	0	0	0	0	0	0	0	0	0	0	0
Noctuidae	Neustrotia	Chorsia japonica (Warren, 1912)	woody	specialist	0	0	0	0	0	0	0	0	0	0	1	0	0	0	0	0	0	0	0	0	0	0	0
Noctuidae	Niphonyx	Niphonyx segregata_(Butler, 1878)	herb	specialist	0	0	0	0	0	0	0	0	0	0	0	0	0	0	0	1	0	0	0	0	0	0	0
Noctuidae	Nycteola	Nycteola asiatica_(Krulikowski, 1904)	woody	generalist	0	0	0	0	0	0	0	0	0	0	0	1	0	0	0	0	0	0	0	0	0	0	0
Noctuidae	Ochropleura	Ochropleura plecta (Linnaeus, 1761)	herb	generalist	0	0	0	0	0	0	0	3	0	0	0	0	0	0	0	2	0	0	0	0	0	0	0
Noctuidae	Orthogonia	Orthogonia sera_Felder & Felder, 1862	herb	specialist	0	0	0	0	0	0	0	0	0	0	0	1	0	0	0	0	0	0	0	0	0	0	0
Noctuidae	Orthosia	Orthosia ella_(Butler, 1878)	herb	generalist	0	0	0	1	0	0	0	0	0	0	0	0	0	0	0	0	0	0	0	0	0	0	0
Noctuidae	Orthosia	Orthosia lizetta_Butler, 1878	woody	specialist	0	0	0	6	0	0	0	0	0	0	0	0	0	0	0	0	0	0	0	0	0	0	0
Noctuidae	Oruza	Oruza mira_(Butler, 1879)	dead leaves	generalist	0	0	0	0	0	0	0	0	0	0	0	0	0	0	0	1	0	0	0	0	0	0	0
Noctuidae	Pangrapta	Pangrapta lunulata (Sterz, 1915)	woody	specialist	0	0	0	0	0	0	0	0	0	0	0	0	1	0	0	0	0	0	0	0	0	0	0
Noctuidae	Pangrapta	Pangrapta obscurata (Butler, 1879)	woody	generalist	0	0	0	0	0	0	0	23	0	0	0	1	1	0	0	1	0	0	0	0	0	0	0
Noctuidae	Pangrapta	Pangrapta umbrosa_(Leech, 1900)	woody	specialist	0	0	0	0	0	0	0	21	0	0	0	0	0	1	0	16	0	0	0	1	0	0	0
Noctuidae	Panolis	Panolis japonica_Draudt, 1935	woody	specialist	0	0	0	3	0	0	0	0	0	0	0	0	0	0	0	0	0	0	0	0	0	0	0
Noctuidae	Paracolax	Paracolax trilinealis_(Bremer, 1864)	unknown	unknown	0	0	0	0	0	0	0	0	0	0	0	0	0	0	0	1	0	0	0	0	0	0	0
Noctuidae	Paracolax	Paracolax tristalis (Fabricius, 1794)	dead leaves	generalist	0	0	0	0	0	0	1	0	1	0	1	0	1	0	2	0	7	0	1	0	0	0	0
Noctuidae	Paragabara	Paragabara flavomacula_(Oberth_r, 1880)	unknown	unknown	0	0	0	0	0	0	0	0	0	0	0	6	0	0	0	5	0	0	0	0	0	0	0
Noctuidae	Perigrapha	Perigrapha hoenei_P_ngeler, 1914	woody	specialist	0	0	0	3	0	0	0	0	0	0	0	0	0	0	0	0	0	0	0	0	0	0	0
Noctuidae	Phyllophila	Phyllophila obliterata (Rambur, 1833)	herb	specialist	0	0	0	0	0	0	0	5	1	1	1	2	1	0	0	0	0	0	0	0	0	0	0
Noctuidae	Plusiodonta	Plusiodonta casta (Butler, 1878)	woody	specialist	0	0	0	0	0	0	0	1	0	0	0	1	1	2	0	1	0	0	0	0	0	0	0
Noctuidae	Prospalta	Prospalta cyclica_(Hampson, 1908)	unknown	unknown	0	0	0	0	0	0	0	0	0	0	0	0	0	0	0	1	0	0	0	0	0	0	0
Noctuidae	Protodeltote	Protodeltote distinguenda (Staudinger, 1888)	herb	specialist	0	0	0	0	0	0	0	31	0	0	0	0	1	0	0	1	0	0	0	0	0	0	0
Noctuidae	Protodeltote	Protodeltote pygarga_(Hufnagel, 1766)	unknown	unknown	0	0	0	0	0	0	0	24	0	0	0	6	0	0	0	1	0	0	0	0	0	0	0
Noctuidae	Pyrrhia	Pyrrhia umbra_(Hufnagel, 1766)	herb	generalist	0	0	0	0	0	0	0	0	0	0	0	0	0	0	0	1	0	0	0	0	0	0	0
Noctuidae	Rhizedra	Rhizedra lutosa_(H_bner, 1803)	herb	specialist	0	0	0	0	0	0	0	0	0	1	0	0	0	0	0	1	0	0	0	1	0	0	0
Noctuidae	Rivula	Rivula sericealis (Scopoli, 1763)	herb	specialist	0	0	0	0	0	0	0	0	0	0	1	0	0	0	0	0	0	0	0	0	0	0	0
Noctuidae	Rusicada	Rusicada privata (Walker, 1865)	woody	specialist	0	0	0	0	0	0	0	0	0	0	0	0	0	0	0	0	0	1	0	0	0	0	0
Noctuidae	Sarcopolia	Sarcopolia illoba_(Butler, 1878)	herb/woody	generalist	0	0	0	0	0	0	0	1	0	0	0	0	0	0	0	0	0	0	0	0	0	0	0
Noctuidae	Schrankia	Schrankia separatalis (Herz, 1905)	unknown	unknown	0	0	0	0	0	0	0	0	0	0	0	0	1	0	0	9	0	0	0	1	0	0	0
Noctuidae	Sesamia	Sesamia confusa (Sugi, 1982)	herb	specialist	0	0	0	0	0	0	0	1	0	0	1	0	0	0	0	0	0	0	0	0	0	0	0
Noctuidae	Sesamia	Sesamia turpis_(Butler, 1879)	herb	specialist	0	0	0	0	0	0	0	0	0	0	0	10	0	0	0	0	0	0	0	0	0	0	0
Noctuidae	Sidemia	Sidemia bremeri (Erschoff, 1867)	unknown	unknown	0	0	0	0	0	0	0	0	0	0	0	0	0	0	0	0	2	6	0	0	0	0	0
Noctuidae	Sineugraphe	Sineugraphe bipartita (Graeser, 1889)	unknown	unknown	0	0	0	0	0	0	0	0	0	0	0	0	1	0	0	0	0	0	0	0	0	0	0
Noctuidae	Sineugraphe	Sineugraphe bipartita_(Graeser, 1889)	unknown	unknown	0	0	0	0	0	0	0	0	0	0	0	5	0	0	0	0	0	0	0	0	0	0	0
Noctuidae	Sineugraphe	Sineugraphe exusta (Butler, 1878)	unknown	unknown	0	0	0	0	0	0	0	1	2	3	3	4	0	1	0	6	0	1	0	0	0	0	0
Noctuidae	Sineugraphe	Sineugraphe oceanica (Kardakoff, 1928)	herb	specialist	0	0	0	0	0	0	0	0	1	1	1	5	0	1	0	0	0	0	0	0	0	0	0
Noctuidae	Sophta	Sophta subrosea_(Butler, 1881)	unknown	unknown	0	0	0	0	0	0	0	0	0	0	0	0	0	0	0	3	0	0	0	0	0	0	0
Noctuidae	Sphragifera	Sphragifera sigillata_(M_n_tri_s, 1859)	woody	generalist	0	0	0	0	0	0	0	0	0	0	0	2	0	0	0	0	0	0	0	0	0	0	0
Noctuidae	Spodoptera	Spodoptera depravata_(Butler, 1879)	herb	specialist	0	0	0	0	0	0	0	6	0	0	0	3	0	0	0	12	0	0	0	0	0	0	0
Noctuidae	Stenhypena	Stenhypena nigripuncta_(Wileman, 1911)	lichen/moss	generalist	0	0	0	0	0	0	0	2	0	0	0	9	0	0	0	2	0	0	0	0	0	0	0
Noctuidae	Stenoloba	Stenoloba clara_(Leech, 1889)	unknown	unknown	0	0	0	0	0	1	0	0	0	0	0	0	0	0	0	0	0	0	0	0	0	0	0
Noctuidae	Stenoloba	Stenoloba jankowskii (Oberth_r, 1885)	unknown	unknown	0	0	0	0	0	0	0	0	0	0	2	0	0	0	0	0	0	0	0	0	0	0	0
Noctuidae	Sugia	Sugia erastroides_(Draudt, 1950)	unknown	unknown	0	0	0	0	0	0	0	0	0	0	0	13	0	0	0	0	0	0	0	0	0	0	0
Noctuidae	Sugia	Sugia idiostygia (Sugi, 1958)	unknown	unknown	0	0	0	0	0	0	0	0	0	0	0	0	1	0	0	0	0	0	0	0	0	0	0
Noctuidae	Sugia	Sugia stygia (Butler, 1878)	unknown	unknown	0	0	0	0	0	0	0	0	1	0	0	0	0	0	0	0	0	0	0	0	0	0	0
Noctuidae	Sypnoides	Sypnoides picta (Butler, 1877)	woody	generalist	0	0	0	0	0	0	0	0	1	0	0	0	0	0	0	0	0	0	0	0	0	0	0
Noctuidae	Telorta	Telorta edentata (Leech, 1889)	woody	generalist	0	0	0	0	0	0	0	0	0	0	0	0	0	0	0	0	0	0	0	0	0	1	0
Noctuidae	Thyas	Thyas juno_(Dalman, 1823)	woody	generalist	0	0	0	0	0	0	0	0	0	0	0	1	0	0	0	0	0	0	0	0	0	0	0
Noctuidae	Trachea	Trachea punkikonis Matsumura, 1927	herb	specialist	0	0	0	0	0	0	0	0	0	0	0	1	0	0	0	0	0	0	0	0	0	0	0
Noctuidae	Trachea	Trachea tokiensis_(Butler, 1884)	herb	specialist	0	0	0	0	0	0	0	1	0	0	0	0	0	0	0	0	0	0	0	0	0	0	0
Noctuidae	Treitschkendia	Treitschkendia tarsipennalis_(Treitschke, 1835)	dead leaves	generalist	0	0	0	0	0	0	0	0	0	0	0	0	0	0	0	6	0	0	0	0	0	0	0
Noctuidae	Viminia	Acronicta rumicis (Linnaeus, 1758)	herb/woody	generalist	1	0	0	0	0	0	0	0	0	0	0	1	0	0	0	4	0	0	0	0	0	0	0
Noctuidae	Virgo	Virgo datanidia (Butler, 1885)	unknown	unknown	0	0	0	0	0	0	0	0	0	0	0	0	0	0	0	0	3	10	0	0	0	0	0
Noctuidae	Xestia	Xestia c-nigrum_(Linnaeus, 1758)	herb	generalist	0	0	0	0	0	0	0	0	0	0	0	1	0	0	0	0	0	0	0	0	0	0	0
Noctuidae	Xestia	Xestia ditrapezium (Denis & Schifferm_ller, 1775)	herb	generalist	0	0	0	0	0	0	0	0	0	0	0	1	0	0	0	0	0	0	0	0	0	0	0
Noctuidae	Xestia	Xestia efforescens (Butler, 1879)	unknown	unknown	0	0	0	0	0	0	0	0	3	1	2	6	0	0	0	0	0	4	0	0	0	0	0
Noctuidae	Xestia	Xestia stupenda (Butler, 1878)	herb	generalist	0	0	0	0	0	0	0	0	0	0	0	0	0	0	0	1	4	5	3	0	0	0	0
Noctuidae	Zanclognatha	Zanclognatha lunalis_(Scopoli, 1763)	dead leaves	generalist	0	0	0	0	0	0	0	2	0	0	0	1	0	0	0	0	0	0	0	0	0	0	0
Noctuidae	Zekelita	Zekelita plusioides_(Butler, 1879)	lichen/moss	generalist	0	0	0	0	0	0	0	0	0	0	0	1	0	0	0	0	0	0	0	0	0	0	0
Nolidae	Earias	Earias pudicana Staudinger, 1887	woody	generalist	0	0	0	0	0	0	0	21	0	0	0	2	0	0	0	0	1	0	0	0	0	0	0
Nolidae	Gelastocera	Gelastocera exusta_Butler, 1877	woody	generalist	0	0	0	0	0	0	0	6	0	0	0	3	0	0	0	0	0	0	0	0	0	0	0
Nolidae	Gelastocera	Gelastocera kotschubeji_Obraztsov, 1943	woody	generalist	0	0	0	0	0	0	0	0	0	0	0	0	0	0	0	1	0	0	0	0	0	0	0
Nolidae	Nola	Nola taeniata Snellen, 1874	unknown	unknown	0	0	0	0	0	0	0	0	0	0	0	0	0	0	0	0	1	0	0	0	0	0	0
Nolidae	Nola	Nola trilinea_Marumo, 1923	herb	specialist	0	0	0	0	0	0	0	0	0	0	0	2	0	0	0	0	0	0	0	0	0	0	0
Nolidae	Pseudoips	Pseudoips prasinanus (Linnaeus, 1758)	woody	specialist	0	0	0	0	0	0	0	1	0	0	0	4	0	1	0	0	0	0	0	0	0	0	0
Notodontidae	Clostera	Clostera anachoreta_Denis & Schifferm_ller, 1775	woody	specialist	0	0	0	0	0	0	0	0	0	0	0	1	0	0	0	0	0	0	0	0	0	0	0
Notodontidae	Cutuza	Cutuza straminea_(Walker, 1865)	herb	specialist	0	0	0	0	0	0	0	0	0	0	0	1	0	0	0	0	0	0	0	0	0	0	0
Notodontidae	Epodonta	Epodonta lineata (Oberth_r, 1880)	woody	specialist	1	0	0	0	0	0	0	2	0	0	0	0	0	0	0	1	0	0	0	0	0	0	0
Notodontidae	Fentonia	Fentonia ocypete (Bremer, 1861)	woody	specialist	0	0	0	0	0	0	0	1	0	0	1	3	0	0	0	0	0	0	0	0	0	0	0
Notodontidae	Furcula	Furcula furcula (Clerck, 1759)	woody	specialist	0	0	0	0	0	0	0	0	0	0	0	0	0	0	0	1	0	0	0	0	0	0	0
Notodontidae	Gonoclostera	Gonoclostera timoniorum_(Bremer, 1861)	woody	specialist	0	0	0	0	0	0	0	3	0	0	0	0	0	0	0	2	0	0	0	0	0	0	0
Notodontidae	Hexafrenum	Hexafrenum leucodera_(Staudinger, 1892)	woody	generalist	0	0	0	0	0	0	0	1	0	0	0	0	0	0	0	0	0	0	0	0	0	0	0
Notodontidae	Hupodonta	Hupodonta corticalis_Butler, 1877	woody	specialist	0	0	0	0	0	0	0	0	0	0	0	1	0	0	0	0	0	0	0	0	0	0	0
Notodontidae	Mimopydna	Mimopydna pallida_(Butler, 1877)	herb	specialist	0	0	0	0	0	0	0	4	0	0	0	0	0	0	0	0	0	0	0	0	0	0	0
Notodontidae	Nerice	Nerice bipartita Butler, 1885	woody	specialist	0	0	0	0	0	0	0	0	0	0	0	0	1	0	0	0	0	0	0	0	0	0	0
Notodontidae	Peridea	Peridea gigantea_Butler, 1877	woody	specialist	0	0	0	0	0	0	0	1	0	0	0	0	0	0	0	0	0	0	0	0	0	0	0
Notodontidae	Phalera	Phalera flavescens_(Bremer & Grey, 1853)	woody	specialist	0	0	0	0	0	0	0	0	0	0	0	1	0	0	0	0	0	0	0	0	0	0	0
Notodontidae	Phalerodonta	Phalerodonta manleyi (Leech, 1889)	woody	specialist	0	0	0	0	0	0	0	0	0	0	0	0	0	0	0	0	0	0	0	0	1	0	0
Notodontidae	Pheosiopsis	Pheosiopsis cinerea_(Butler, 1879)	woody	specialist	0	0	0	0	0	0	0	1	0	0	0	0	0	0	0	1	0	0	0	0	0	0	0
Notodontidae	Pterostoma	Pterostoma gigantinum_Staudinger, 1892	woody	specialist	0	0	0	0	0	0	0	9	0	0	0	1	0	0	0	3	0	0	0	0	0	0	0
Notodontidae	Shaka	Shaka atrovittatus (Bremer, 1861)	woody	specialist	0	0	0	0	0	0	0	0	0	0	0	0	1	1	0	0	0	0	0	0	0	0	0
Notodontidae	Stauropus	Stauropus basalis (Moore, 1877)	woody	generalist	0	0	0	0	0	0	3	0	0	0	0	0	0	0	0	1	0	0	0	0	0	0	0
Notodontidae	Stauropus	Stauropus fagi_(Linnaeus, 1758)	woody	generalist	0	0	0	0	0	0	0	1	0	0	0	0	0	0	0	0	0	0	0	0	0	0	0
Notodontidae	Syntypistis	Syntypistis cyanea (Leech, 1889)	woody	specialist	0	0	0	1	0	0	0	0	0	0	0	0	0	0	0	0	0	0	0	0	0	0	0
Oecophorinae	Acryptolechia	Acryptolechia malacobyrsa (Meyrick, 1921)	dead leaves	generalist	0	0	0	0	0	0	0	0	0	0	0	0	0	0	2	0	0	0	0	0	0	0	0
Oecophorinae	Acryptolechia	Acryptolechia sp. 1	unknown	unknown	0	0	0	0	0	0	0	0	0	0	0	0	2	1	0	0	0	0	0	0	0	0	0
Oecophorinae	Periacma	Periacma delegata Meyrick, 1914	unknown	unknown	0	0	0	0	0	0	0	0	1	1	0	0	0	0	0	0	0	0	0	0	0	0	0
Oecophorinae	Tyrolimnas	Tyrolimnas anthraconesa Meyrick, 1934	dead leaves	generalist	0	0	0	0	0	0	0	0	0	0	0	0	1	0	0	0	0	0	0	0	0	0	0
Pyralidae	Acrobasis	Acrobasis bellulella_(Ragonot, 1893)	woody	generalist	0	0	0	0	0	0	0	0	0	0	0	1	0	0	0	0	0	0	0	0	0	0	0
Pyralidae	Acrobasis	Acrobasis birgitella_(Roesler, 1975)	woody	specialist	0	0	0	0	0	0	0	0	0	0	0	1	0	0	0	0	0	0	0	0	0	0	0
Pyralidae	Acrobasis	Acrobasis ferruginella_Wileman, 1911	woody	specialist	0	0	0	0	0	0	0	0	0	0	0	1	0	0	0	1	0	0	0	0	0	0	0
Pyralidae	Acrobasis	Acrobasis squalidella Christoph, 1881	woody	specialist	0	0	0	0	0	0	0	0	0	0	0	0	1	0	1	0	0	0	0	0	0	0	0
Pyralidae	Addyme	Addyme confusalis Yamanaka, 2006	herb/woody	generalist	1	0	0	0	4	0	0	8	0	0	0	3	2	0	1	0	0	0	0	0	0	0	0
Pyralidae	Assara	Assara funerella_(Ragonot, 1901)	woody	specialist	0	0	0	0	0	0	0	0	0	0	0	1	0	0	0	2	0	0	0	0	0	0	0
Pyralidae	Ceroprepes	Ceroprepes ophthalmicella_(Christoph, 1881)	woody	specialist	0	0	0	0	0	0	0	0	0	0	0	0	0	0	0	1	0	0	0	0	0	0	0
Pyralidae	Ceroprepes	Ceroprepes patriciella_Zeller, 1867	unknown	unknown	0	0	0	0	0	0	0	0	0	0	0	0	0	0	0	1	0	0	0	0	0	0	0
Pyralidae	Ectomyelois	Ectomyelois pyrivorella_(Matsumura, 1899)	woody	specialist	0	0	0	0	0	0	0	0	0	0	0	0	0	0	0	1	0	0	0	0	0	0	0
Pyralidae	Emmalocera	Emmalocera venosella (Wileman, 1911)	unknown	unknown	0	0	0	0	0	0	0	0	0	0	0	2	1	0	2	25	0	0	0	0	0	0	0
Pyralidae	Endotricha	Endotricha consocia (Butler, 1879)	unknown	unknown	0	0	0	0	0	0	0	0	0	0	0	0	1	0	1	0	0	0	0	0	0	0	0
Pyralidae	Endotricha	Endotricha kuznetzovi Whalley, 1963	dead leaves	generalist	0	0	0	0	0	0	0	0	0	0	0	1	1	1	0	1	0	0	0	0	0	0	0
Pyralidae	Endotricha	Endotricha olivacealis (Bremer, 1864)	dead leaves	generalist	0	0	0	0	0	0	0	0	3	0	0	107	3	0	4	0	0	0	0	0	0	0	0
Pyralidae	Etielloides	Etielloides bipartitellus_(Leech, 1889)	unknown	unknown	0	0	0	0	0	0	0	16	0	0	0	0	0	0	0	0	0	0	0	0	0	0	0
Pyralidae	Euzophera	Euzophera batangensis_Caradja, 1939	woody	generalist	0	0	0	0	0	0	0	1	0	0	0	1	0	0	0	0	0	0	0	0	0	0	0
Pyralidae	Furucata	Furcata dichromella (Ragonot, 1893)	woody	specialist	0	0	0	0	0	0	0	0	0	0	0	8	0	0	0	0	0	0	0	0	0	0	0
Pyralidae	Furucata	Furcata hollandella_(Ragonot, 1893)	woody	specialist	0	0	0	0	0	0	0	0	0	0	0	2	0	0	0	0	0	0	0	0	0	0	0
Pyralidae	Furucata	Furcata pseudodichromella_(Yamanaka, 1980)	woody	specialist	0	0	0	0	0	0	0	1	0	0	0	1	0	0	0	0	0	0	0	0	0	0	0
Pyralidae	Hypsopygia	Hypsopygia regina (Butler, 1879)	woody	generalist	0	0	0	0	0	0	0	0	1	0	1	0	0	0	1	0	0	0	0	0	0	0	0
Pyralidae	Lepidogma	Lepidogma melanobasis Hampson, 1906	unknown	unknown	0	0	0	0	0	0	0	0	0	0	2	0	1	0	0	0	0	0	0	0	0	0	0
Pyralidae	Locastra	Locastra muscosalis_(Walker, 1866)	woody	generalist	0	0	0	0	0	0	0	0	0	0	0	4	0	0	0	0	0	0	0	0	0	0	0
Pyralidae	Maliarpha	Maliarpha borealis Sasaki, 2012	unknown	unknown	0	0	0	0	0	0	0	0	0	0	0	0	1	0	0	0	0	0	0	0	0	0	0
Pyralidae	Nyctegretis	Nyctegretis trigangulella_(Hampson, 1901)	unknown	unknown	0	0	0	0	0	0	0	0	0	0	0	0	0	0	0	8	0	0	0	0	0	0	0
Pyralidae	Oncocera	Oncocera bitinctella_(Wileman, 1911)	unknown	unknown	0	0	0	0	0	0	0	0	0	0	0	1	0	0	0	0	0	0	0	0	0	0	0
Pyralidae	Oncocera	Oncocera semirubella (Scopoli, 1763)	herb	specialist	0	0	0	0	0	0	0	0	2	0	1	1	0	0	1	0	7	4	1	0	0	0	0
Pyralidae	Orthaga	Orthaga achatina (Butler, 1878)	woody	generalist	0	0	0	0	0	0	0	0	0	0	1	0	0	0	0	0	0	0	0	0	0	0	0
Pyralidae	Orthaga	Orthaga euadrusalis Walker, 1859	woody	specialist	0	0	0	0	0	0	0	0	0	0	0	0	0	0	1	0	0	0	0	0	0	0	0
Pyralidae	Ortholepis	Ortholepis infausta_(Ragonot, 1893)	unknown	unknown	0	0	0	0	0	0	0	0	0	0	0	1	0	0	0	0	0	0	0	0	0	0	0
Pyralidae	Orthopygia	Orthopygia placens_(Butler, 1879)	unknown	unknown	0	0	0	0	0	0	0	0	0	0	0	2	0	0	0	0	0	0	0	0	0	0	0
Pyralidae	Paraemmalocera	Paraemmalocera gensanalis_(South, 1901)	unknown	unknown	0	0	0	0	0	0	0	0	0	0	0	1	0	0	0	0	0	0	0	0	0	0	0
Pyralidae	Patagoniodes	Patagoniodes nipponellus_(Ragonot, 1901)	unknown	unknown	0	0	0	0	0	0	0	0	0	0	0	1	0	0	0	0	0	0	0	0	0	0	0
Pyralidae	Phycitodes	Phycitodes matsumurellus (Shibuya, 1927)	unknown	unknown	0	0	0	0	0	0	0	0	0	0	0	0	0	0	0	0	1	0	0	0	0	0	0
Pyralidae	Pseudacrobasis	Pseudacrobasis nankingella Roesler, 1975	unknown	unknown	0	0	0	0	0	0	0	0	1	0	0	0	0	0	0	0	0	0	0	0	0	0	0
Pyralidae	Quasipuer	Quasipuer colon (Christoph, 1881)	unknown	unknown	0	0	0	0	0	0	0	0	0	0	0	0	0	0	0	1	0	0	1	0	0	0	0
Pyralidae	Sacada	Sacada fasciata (Butler, 1878)	woody	generalist	0	0	0	0	0	0	0	0	0	0	1	1	0	0	0	0	0	0	0	0	0	0	0
Pyralidae	Salma	Salma amica_(Butler, 1879)	unknown	unknown	0	0	0	0	0	0	0	0	0	0	0	6	0	0	0	0	0	0	0	0	0	0	0
Pyralidae	Salma	Salma elegans (Butler, 1881)	herb/woody	generalist	0	0	0	0	0	0	0	0	1	0	0	3	0	0	0	0	0	0	0	0	0	0	0
Pyralidae	Scirpophaga	Scirpophaga virginia_Schultze, 1908	unknown	unknown	0	0	0	0	0	0	0	0	0	0	0	0	0	0	0	8	0	0	0	0	0	0	0
Pyralidae	Scirpophaga	Scirpophaga xanthopygata_Schawerda, 1922	unknown	unknown	0	0	0	0	0	0	0	0	0	0	0	1	0	0	0	0	0	0	0	0	0	0	0
Pyralidae	Selagia	Selagia spadicella (H_bner, 1796)	unknown	unknown	0	0	0	0	0	0	0	0	0	0	0	0	0	0	0	0	0	0	1	0	0	0	0
Pyralidae	Tegulifera	Tegulifera bicoloralis_(Leech, 1889)	dead leaves	generalist	0	0	0	0	0	0	0	0	0	0	0	1	0	0	0	0	0	0	0	0	0	0	0
Pyralidae	Termioptycha	Termioptycha margarita (Butler, 1879)	unknown	unknown	0	0	0	0	0	0	0	2	0	0	1	9	0	0	0	0	0	0	0	0	0	0	0
Pyralidae	Trebania	Trebania flavifrontalis (Leech, 1889)	unknown	unknown	0	0	0	0	0	0	0	0	1	0	0	0	0	0	0	0	0	0	0	0	0	0	0
Saturnidae	Actias	Actias aliena (Butler, 1879)	woody	generalist	0	0	0	0	0	0	0	2	0	0	0	0	0	0	0	0	0	0	0	0	0	0	0
Saturnidae	Saturnia	Saturnia japonica (Moore, 1872)	woody	generalist	0	0	0	0	0	0	0	0	0	0	0	0	0	0	0	0	0	0	0	1	0	0	0
Saturnidae	Saturnia	Saturnia jonasii (Butler, 1877)	woody	generalist	0	0	0	0	0	0	0	0	0	0	0	0	0	0	0	0	0	0	0	0	1	3	8
Sphingidae	Acosmeryx	Acosmeryx naga (Moore, 1858)	woody	specialist	1	0	1	0	0	0	3	7	0	0	0	0	0	0	0	0	0	0	0	0	0	0	0
Sphingidae	Agrius	Agrius convolvuli (Linnaeus, 1758)	herb	generalist	0	0	0	0	0	0	0	0	0	0	0	0	0	0	0	0	0	2	0	0	0	0	0
Sphingidae	Ambulyx	Ambulyx ochracea_Butler, 1885	woody	specialist	0	0	0	0	0	0	0	1	0	0	0	0	0	0	0	0	0	0	0	0	0	0	0
Sphingidae	Ampelophaga	Ampelophaga rubiginosa Bremer & Grey, 1853	woody	specialist	0	0	0	0	0	0	0	0	1	0	1	13	0	0	0	0	0	0	0	0	0	0	0
Sphingidae	Callambulyx	Callambulyx tatarinovii (Bremer & Grey, 1852)	woody	specialist	0	0	0	0	0	0	0	2	0	0	0	1	0	0	0	0	0	0	0	0	0	0	0
Sphingidae	Clanis	Clanis bilineata (Walker, 1866)	herb/woody	generalist	0	0	0	0	0	0	0	0	1	0	0	15	0	0	0	1	0	0	0	0	0	0	0
Sphingidae	Deilephila	Deilephila askoldensis (Oberth_r, 1879)	herb	specialist	0	0	0	0	1	1	0	3	0	0	0	1	0	0	0	0	0	0	0	0	0	0	0
Sphingidae	Deilephila	Deilephila elpenor (Linnaeus, 1758)	herb	generalist	0	0	0	0	0	0	0	4	0	0	0	2	0	0	0	0	0	0	0	0	0	0	0
Sphingidae	Marumba	Marumba gaschkewitschii (Bremer & Grey, 1853)	herb/woody	specialist	0	0	0	0	0	0	0	1	0	2	4	9	0	0	0	0	0	0	0	0	0	0	0
Sphingidae	Marumba	Marumba sperchius (M_n_tri_s, 1857)	woody	specialist	0	0	0	0	0	0	0	0	0	0	0	1	0	0	0	0	0	0	0	0	0	0	0
Sphingidae	Smerinthus	Smerinthus planus Walker, 1856	woody	generalist	0	0	0	0	0	0	0	0	0	0	0	0	0	0	0	1	0	0	0	0	0	0	0
Sphingidae	Theretra	Theretra japonica (Boisduval, 1869)	herb/woody	generalist	0	0	0	0	0	0	0	0	0	0	1	0	0	1	0	2	0	0	0	0	0	0	0
Thyrididae	Striglina	Striglina cancellata (Christoph, 1881)	woody	specialist	0	0	0	0	0	0	0	1	0	0	0	0	2	0	0	0	0	0	0	0	0	0	0
Tortricidae	Aethes	Aethes cnicana (Westwood, 1854)	unknown	unknown	0	0	0	0	0	0	0	1	0	0	0	0	0	0	0	0	0	0	0	0	0	0	0
Tortricidae	Aethes	Aethes rectilineana_(Caradja, 1939)	unknown	unknown	0	0	0	0	0	0	0	0	0	0	0	0	0	0	0	1	0	0	0	0	0	0	0
Tortricidae	Ancylis	Ancylis mandarinana_Walsingham, 1900	woody	specialist	0	0	0	0	0	0	0	2	0	0	0	0	0	0	0	6	0	0	0	0	0	0	0
Tortricidae	Apotomis	Apotomis basipunctana (Walsingham, 1900)	woody	specialist	0	0	0	0	0	0	0	0	0	0	0	0	0	0	1	0	0	0	0	0	0	0	0
Tortricidae	Apotomis	Apotomis capreana_(H_bner, 1817)	woody	generalist	0	0	0	0	0	0	0	0	0	0	0	0	0	0	0	1	0	0	0	0	0	0	0
Tortricidae	Apotomis	Apotomis geminata_(Walsingham, 1900)	woody	generalist	0	0	0	0	0	0	0	1	0	0	0	1	0	0	0	0	0	0	0	0	0	0	0
Tortricidae	Archips	Archips audax_Razowski, 1977	herb/woody	generalist	0	0	0	0	0	0	0	0	0	0	0	2	0	0	0	0	0	0	0	0	0	0	0
Tortricidae	Archips	Archips fuscocupreana_Walsingham, 1900	herb/woody	generalist	0	0	0	0	0	0	0	0	0	0	0	2	0	0	0	1	0	0	0	0	0	0	0
Tortricidae	Archips	Archips ingentana_(Christoph, 1881)	herb/woody	generalist	0	0	0	0	0	0	0	0	0	0	0	1	0	0	0	0	0	0	0	0	0	0	0
Tortricidae	Archips	Archips oporana_(Linnaeus, 1758)	woody	generalist	0	0	0	0	0	0	0	0	0	0	0	0	0	0	0	1	0	0	0	0	0	0	0
Tortricidae	Archips	Archips semistructa (Meyrick, 1937)	herb/woody	generalist	0	0	0	0	0	0	0	0	0	0	0	0	0	0	0	2	0	0	0	0	0	0	0
Tortricidae	Choristoneura	Choristoneura longicellana_(Walsingham, 1900)	woody	generalist	0	0	0	0	0	0	0	0	0	0	0	0	0	0	0	1	0	0	0	0	0	0	0
Tortricidae	Cochylidia	Cochylidia subroseana_(Haworth, 1811)	herb	specialist	0	0	0	0	0	0	0	0	0	0	0	0	0	0	0	1	0	0	0	0	0	0	0
Tortricidae	Cydia	Cydia danilevskyi_(Kuznetzov, 1973)	woody	specialist	0	0	0	0	0	0	0	0	0	0	0	0	0	0	0	32	0	0	0	0	0	0	0
Tortricidae	Diplocalyptis	Diplocalyptis congruentana (Kennel, 1901)	herb	specialist	0	0	0	0	0	0	0	0	0	0	0	0	0	0	3	0	0	0	0	0	0	0	0
Tortricidae	Epiblema	Epiblema autolitha_(Meyrick, 1931)	unknown	unknown	0	0	0	0	0	0	0	0	0	0	0	1	0	0	0	0	0	0	0	0	0	0	0
Tortricidae	Epiblema	Epiblema foenella (Linnaeus, 1758)	herb	specialist	0	0	0	0	0	0	0	0	1	0	0	5	1	1	1	1	0	1	0	0	0	0	0
Tortricidae	Epinotia	Epinotia bicolor_(Walsingham, 1900)	woody	specialist	0	0	0	0	0	0	0	0	0	0	0	1	0	0	0	0	0	0	0	0	0	0	0
Tortricidae	Epinotia	Epinotia majorana_(Caradja, 1916)	herb	specialist	0	0	0	0	0	0	0	0	0	0	0	9	0	0	0	0	0	0	0	0	0	0	0
Tortricidae	Eucosma	Eucosma catharaspis_(Meyrick, 1922)	unknown	unknown	0	0	0	0	0	0	0	0	0	0	0	0	0	0	0	3	0	0	0	0	0	0	0
Tortricidae	Eucosma	Eucosma denigratana_(Kennel, 1901)	unknown	unknown	0	0	0	0	0	0	0	0	0	0	0	0	0	0	0	2	0	0	0	0	0	0	0
Tortricidae	Eucosma	Eucosma metzneriana_(Treitschke, 1830)	herb	specialist	0	0	0	0	0	0	0	2	0	0	0	0	0	0	0	0	0	0	0	0	0	0	0
Tortricidae	Eucosma	Eucosma striatiradix_Kuznetzov, 1964	unknown	unknown	0	0	0	0	0	0	0	0	0	0	0	0	0	0	0	1	0	0	0	0	0	0	0
Tortricidae	Eucosma	Eucosma tundrana (Kennel, 1900)	unknown	unknown	0	0	0	0	1	0	0	0	0	0	0	0	0	0	0	0	0	0	0	0	0	0	0
Tortricidae	Eudemis	Eudemis porphyrana (H_bner, 1799)	woody	specialist	0	0	0	0	0	0	0	0	0	0	0	0	1	0	0	0	0	0	0	0	0	0	0
Tortricidae	Eugnosta	Eugnosta dives (Butler, 1878)	herb	specialist	0	0	0	0	0	0	0	0	0	1	0	0	0	0	0	0	0	0	0	0	0	0	0
Tortricidae	Eupoecilia	Eupoecilia ambiguella (H_bner, 1976)	woody	generalist	0	0	0	0	0	0	0	0	0	0	1	0	0	0	0	0	0	0	0	0	0	0	0
Tortricidae	Eupoecilia	Eupoecilia inouei Kawabe, 1972	unknown	unknown	0	0	0	0	2	0	0	1	0	0	0	0	0	0	0	10	0	0	0	0	0	0	0
Tortricidae	Gravitarmata	Gravitarmata margarotana_(Heinemann, 1863)	woody	specialist	0	0	0	3	0	0	0	0	0	0	0	0	0	0	0	0	0	0	0	0	0	0	0
Tortricidae	Gynnidomorpha	Gynnidomorpha vectisana_(Humphreys & Westwood, 1845)	herb	specialist	0	0	0	0	0	0	0	0	0	0	0	0	0	0	0	28	0	0	0	0	0	0	0
Tortricidae	Gypsonoma	Gypsonoma dealbana (Fr_lich, 1828)	woody	generalist	0	0	0	0	0	0	1	0	0	0	0	0	0	0	0	0	0	0	0	0	0	0	0
Tortricidae	Hedya	Hedya auricristana_(Walsingham, 1900)	woody	generalist	0	0	0	0	0	0	0	1	0	0	0	0	0	0	0	0	0	0	0	0	0	0	0
Tortricidae	Lobesia	Lobesia reliquana_(H_bner, 1776)	unknown	unknown	0	0	0	0	0	0	0	5	0	0	0	8	0	0	0	10	0	0	0	0	0	0	0
Tortricidae	Matsumuraeses	Matsumuraeses phaseoli_(Matsumura, 1900)	herb	specialist	0	0	0	0	0	0	0	3	0	0	0	2	0	0	0	0	0	0	0	0	0	0	0
Tortricidae	Neoanathamna	Neoanathamna nipponica (Kawabe, 1976)	dead leaves	generalist	0	0	0	0	0	0	6	0	0	0	0	0	0	0	0	0	0	0	0	0	0	0	0
Tortricidae	Neocalyptis	Neocalyptis angustilineata_(Walsingham, 1900)	dead leaves	generalist	0	0	0	0	0	0	0	0	0	0	0	0	0	0	0	2	0	0	0	0	0	0	0
Tortricidae	Olethreutes	Olethreutes examinata_(Falkovitsh, 1966)	unknown	unknown	0	0	0	0	0	0	0	0	0	0	0	2	0	0	0	0	0	0	0	0	0	0	0
Tortricidae	Pandemis	Pandemis dumetana (Treitschke, 1835)	herb/woody	generalist	0	0	0	0	0	1	0	0	1	0	1	0	0	0	0	1	2	1	1	0	0	0	0
Tortricidae	Phaecasiophora	Phaecasiophora roseana (Walsingham, 1900)	woody	specialist	0	0	0	0	0	0	0	1	0	0	0	0	1	0	1	0	0	0	0	0	0	0	0
Tortricidae	Phtheochroa	Phtheochroa pistrinana (Erschoff, 1877)	herb	specialist	0	0	0	0	0	0	1	0	0	0	0	2	0	0	2	0	0	0	0	0	0	0	0
Tortricidae	Ptycholoma	Ptycholoma lecheana (Linnaeus, 1758)	woody	generalist	0	0	0	0	0	0	0	1	0	0	0	0	0	0	0	0	0	0	0	0	0	0	0
Tortricidae	Saliciphaga	Saliciphaga acharis_(Butler, 1879)	woody	specialist	0	0	0	0	0	0	0	0	0	0	0	1	0	0	0	0	0	0	0	0	0	0	0
